# Supplementary material for: Exploring the influence of physical and chemical factors on new particle formation in a polluted megacity
Source: Royal Society of Chemistry journal article supplement (doi:10.1039/d4ea00114a), 2024-11-05
Supplement: d4ea00114a1.pdf [file d4ea00114a1.pdf]

## Supplementary File:

Table S1: Descriptive analysis of particle size distribution and modes during the study period and different seasons.

|                            | Geom. Mean<br>(nm) | Nucleation<br>(cm <sup>-3</sup> ) | Aitken<br>(cm <sup>-3</sup> ) | Accumulation<br>(cm <sup>-3</sup> ) | Total<br>(cm <sup>-3</sup> ) |
|----------------------------|--------------------|-----------------------------------|-------------------------------|-------------------------------------|------------------------------|
| <b>Entire Study Period</b> |                    |                                   |                               |                                     |                              |
| <b>mean</b>                | 6.48e+01           | 7.28e+03                          | 1.77e+04                      | 9.82e+03                            | 3.48e+04                     |
| <b>std</b>                 | 2.20e+01           | 5.81e+03                          | 1.24e+04                      | 7.05e+03                            | 1.99e+04                     |
| <b>min</b>                 | 2.01e+01           | 7.61e+01                          | 1.36e+03                      | 4.84e+02                            | 2.41e+03                     |
| <b>25%</b>                 | 4.83e+01           | 2.88e+03                          | 8.74e+03                      | 4.83e+03                            | 2.06e+04                     |
| <b>50%</b>                 | 6.26e+01           | 5.74e+03                          | 1.43e+04                      | 8.12e+03                            | 3.05e+04                     |
| <b>75%</b>                 | 7.91e+01           | 1.01e+04                          | 2.28e+04                      | 1.27e+04                            | 4.38e+04                     |
| <b>max</b>                 | 1.66e+02           | 6.54e+04                          | 9.02e+04                      | 6.33e+04                            | 1.43e+05                     |
| <b>Winter</b>              |                    |                                   |                               |                                     |                              |
| <b>mean</b>                | 7.70e+01           | 5.64e+03                          | 2.13e+04                      | 1.42e+04                            | 4.11e+04                     |
| <b>std</b>                 | 2.05e+01           | 5.56e+03                          | 1.53e+04                      | 8.82e+03                            | 2.44e+04                     |
| <b>min</b>                 | 2.56e+01           | 7.61e+01                          | 2.70e+03                      | 1.98e+03                            | 6.50e+03                     |
| <b>25%</b>                 | 6.24e+01           | 1.97e+03                          | 1.05e+04                      | 7.79e+03                            | 2.35e+04                     |
| <b>50%</b>                 | 7.62e+01           | 4.01e+03                          | 1.60e+04                      | 1.13e+04                            | 3.42e+04                     |
| <b>75%</b>                 | 9.02e+01           | 7.27e+03                          | 2.71e+04                      | 1.85e+04                            | 5.27e+04                     |
| <b>max</b>                 | 1.43e+02           | 6.54e+04                          | 9.02e+04                      | 6.33e+04                            | 1.43e+05                     |
| <b>Spring</b>              |                    |                                   |                               |                                     |                              |
| <b>mean</b>                | 5.46e+01           | 1.01e+04                          | 1.80e+04                      | 7.65e+03                            | 3.57e+04                     |
| <b>std</b>                 | 1.90e+01           | 6.59e+03                          | 1.07e+04                      | 4.20e+03                            | 1.62e+04                     |
| <b>min</b>                 | 2.01e+01           | 3.69e+02                          | 2.07e+03                      | 1.13e+03                            | 4.86e+03                     |
| <b>25%</b>                 | 3.91e+01           | 5.14e+03                          | 1.01e+04                      | 4.52e+03                            | 2.42e+04                     |
| <b>50%</b>                 | 5.08e+01           | 8.82e+03                          | 1.55e+04                      | 6.69e+03                            | 3.32e+04                     |
| <b>75%</b>                 | 6.69e+01           | 1.40e+04                          | 2.31e+04                      | 1.03e+04                            | 4.40e+04                     |
| <b>max</b>                 | 1.19e+02           | 4.34e+04                          | 5.95e+04                      | 2.50e+04                            | 9.36e+04                     |
| <b>Summer</b>              |                    |                                   |                               |                                     |                              |
| <b>mean</b>                | 5.66e+01           | 6.89e+03                          | 1.28e+04                      | 5.62e+03                            | 2.53e+04                     |
| <b>std</b>                 | 1.92e+01           | 5.21e+03                          | 8.58e+03                      | 3.53e+03                            | 1.37e+04                     |
| <b>min</b>                 | 2.11e+01           | 1.94e+02                          | 1.36e+03                      | 4.84e+02                            | 2.41e+03                     |
| <b>25%</b>                 | 4.20e+01           | 2.77e+03                          | 6.59e+03                      | 3.05e+03                            | 1.50e+04                     |
| <b>50%</b>                 | 5.42e+01           | 5.47e+03                          | 1.00e+04                      | 4.73e+03                            | 2.27e+04                     |
| <b>75%</b>                 | 6.97e+01           | 9.83e+03                          | 1.64e+04                      | 7.45e+03                            | 3.29e+04                     |
| <b>max</b>                 | 1.30e+02           | 3.01e+04                          | 4.79e+04                      | 1.99e+04                            | 8.54e+04                     |
| <b>Post Monsoon</b>        |                    |                                   |                               |                                     |                              |
| <b>mean</b>                | 6.69e+01           | 8.21e+03                          | 1.95e+04                      | 1.15e+04                            | 3.92e+04                     |
| <b>std</b>                 | 2.06e+01           | 5.25e+03                          | 1.13e+04                      | 4.84e+03                            | 1.66e+04                     |
| <b>min</b>                 | 2.85e+01           | 4.39e+02                          | 2.20e+03                      | 2.43e+03                            | 6.60e+03                     |
| <b>25%</b>                 | 5.28e+01           | 4.39e+03                          | 1.06e+04                      | 7.76e+03                            | 2.68e+04                     |
| <b>50%</b>                 | 6.23e+01           | 7.19e+03                          | 1.68e+04                      | 1.14e+04                            | 3.67e+04                     |
| <b>75%</b>                 | 7.72e+01           | 1.10e+04                          | 2.62e+04                      | 1.47e+04                            | 4.89e+04                     |
| <b>max</b>                 | 1.66e+02           | 3.26e+04                          | 7.36e+04                      | 3.88e+04                            | 1.11e+05                     |

4

5

6

7

8  
9  
10  
11  
12  
13  
14  
15  
16

Table S2: Calibration values applied to the dataset.

| Species  | RIE  | RF        |
|----------|------|-----------|
| Ammonium | 4.64 | 3.36 E-11 |
| Chloride | 0.57 |           |
| Nitrate  | 1.05 |           |
| Sulphate | 0.89 |           |
| Organics | 1.4  |           |

Table S3: Comparison of PM<sub>2.5</sub> (or PM<sub>1</sub>) concentration ranges and averages across different studies in Delhi.

| S. No. | Average concentration (µg/m <sup>3</sup> ) | PM type                 | Period of Study                                     | Data Source                                 | References                        |
|--------|--------------------------------------------|-------------------------|-----------------------------------------------------|---------------------------------------------|-----------------------------------|
| 1      | 125 ± 86 (Entire study period, 15 years)   | PM <sub>2.5</sub>       | 2007-2021                                           | CPCB, DPCC, and IMD                         | Chetna et al. (2022) <sup>1</sup> |
|        | 154 ± 51 (Highest Annual average, 2009)    |                         |                                                     |                                             |                                   |
|        | 99 ± 81 (Lowest Annual average, 2020)      |                         |                                                     |                                             |                                   |
| 2      | Annual mean in excess of 100 for each year | PM <sub>2.5</sub>       | 2013-2019                                           | US embassy in New Delhi                     | Li et al. (2019) <sup>2</sup>     |
| 3      | 167.6                                      | PM <sub>2.5</sub>       | Winter (Dec 2013 -Jan 2014) and Summer (June 2014)  | Offline filter-based                        | Pant et al. (2015) <sup>3</sup>   |
|        | 12-hourly average range (3-3 - 424.9)      |                         |                                                     |                                             |                                   |
|        | 108.75 (Excluding Post Monsoon period)     | NR-PM <sub>1</sub> + BC | Jan 2017 to March 2018                              | ACSM and Aethalometer                       | Gani et al. (2019) <sup>4</sup>   |
| 4      | Daily average range (13 and above 400)     |                         |                                                     |                                             |                                   |
| 5      | 140                                        | PM <sub>2.5</sub>       | 2017                                                | DPCC RK Puram                               | Gani et al. (2019) <sup>4</sup>   |
| 6      | 125                                        | PM <sub>2.5</sub>       | 2022 (Excluding the Monsoon period as in our study) | DPCC, RK Puram and CPCB, Sri Aurobindo Marg | CPCB                              |
|        | Hourly Range (5.25 - 920)                  |                         |                                                     |                                             |                                   |

**Table S4:** Condensation sink (CS) thresholds for new particle formation (NPF) observed in various global locations, highlighting differences between urban, semi-urban, remote, and background regions. The table includes a comparison of CS thresholds across different environments, showing how regional pollution levels and aerosol concentrations influence the threshold for NPF.

| S. No. | CS Threshold (s <sup>-1</sup> ) | Region                               | Region Type         | Reference                             |
|--------|---------------------------------|--------------------------------------|---------------------|---------------------------------------|
| 1      | 0.01                            | Boreal forest in Hyytiälä, Finland.  | Remote              | Dada et al. (2017) <sup>5</sup>       |
| 2      | 0.039                           | Beijing, China                       | Urban               | Ying Zhou et al. (2021) <sup>6</sup>  |
| 3      | 0.02                            | Po Valley, Italy                     | Urban               | Cia et al. (2024) <sup>7</sup>        |
| 4      | 0.06                            | Beijing, China                       | Urban               | Du et al. (2022) <sup>8</sup>         |
| 5      | 0.001 to 0.002                  | 6 Arctic regions                     | Remote              | Brean et al. (2023) <sup>9</sup>      |
| 6      | 0.002                           | Southeastern Tibetan Plateau         | Remote              | Lai et al. (2024) <sup>10</sup>       |
| 7      | 0.007                           | Delhi, India                         | Urban               | Monkkonen et al. (2005) <sup>11</sup> |
| 8      | 0.1                             | Shanghai, China                      | Urban               | Xiao et al. (2015) <sup>12</sup>      |
| 9      | 0.0046                          | Eagle Lake, British Columbia, Canada | Remote              | Andreae et al. (2022) <sup>13</sup>   |
| 10     | 0.03                            | Pune, India                          | Semi-urban          | Kanawade et al. (2014) <sup>14</sup>  |
| 11     | 0.06                            | Kanpur, India                        | Semi-urban          | Kanawade et al. (2014) <sup>14</sup>  |
| 12     | 0.0058                          | Western Himalaya, India              | Mountain background | Sebastian et al. (2021) <sup>15</sup> |
| 13     | 0.002                           | Helsinki, Finland                    | Urban               | Hussein et al. (2008) <sup>16</sup>   |
| 14     | 0.003                           | Leece, Italy                         | Urban               | Dinoi et al. (2021) <sup>17</sup>     |

23

24

25

26

27

28

29

30

31

32

33

34

## 35 S1. Sampling Site

36 The aerosol sampling occurred inside the Indian Institute of Technology (IIT), Delhi campus, situated  
37 at coordinates 28.5457° N and 77.1928° E, with an elevation of 230 meters above sea level. The  
38 campus is in South Delhi and is surrounded by residential, educational, and commercial buildings,  
39 representing the urban Delhi area (Figure S1). The nearest local emission source is an arterial road  
40 approximately 150 meters from the sampling site.

41

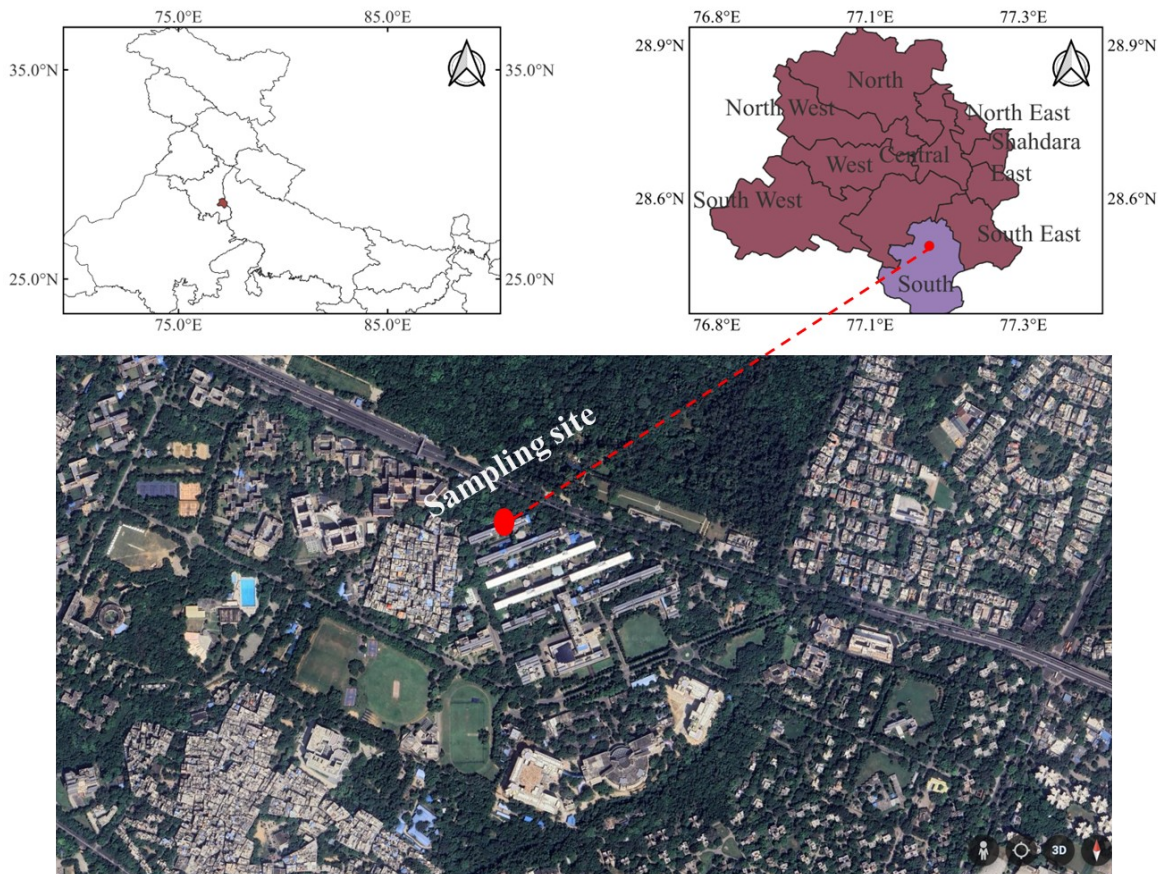

Figure S1: Location of the sampling site.

42

## 43 S2. Instrumentation Operation and calibration

44 A PM<sub>2.5</sub> cyclone was installed before the sampling inlet to remove coarse particles larger than 2.5  
45 μm. The PM + Cyclone model used was URG-2000-30ED. An external pump drew ambient air into  
46 the container at a flow rate of 3 L/min, with approximately 0.1 L/min of the drawn air being sampled  
47 into the ACSM. The particle residence time in the sampling tube was about 5 seconds. Aerosol  
48 particles were dried using a Nafion dryer before being sampled into the ACSM. Prior to the campaign,  
49 the ACSM was calibrated with pure ammonium nitrate and ammonium sulphate particles following

50 standard protocols. The sampling line was placed on a rooftop (~15 m above ground level), and the  
51 instruments were located inside a temperature and humidity-controlled room on the topmost floor.  
52 Conditions inside the building were maintained at temperatures below 26°C and relative humidity  
53 below 40%.

54 A ¼ inch (outside diameter) stainless steel tube with a flow rate of 1.7 lpm was used to draw an  
55 ambient air sample inside the well-maintained and temperature-controlled room, of which 0.1 lpm  
56 was subsampled into the ACSM. At the beginning of the sample intake, a URG cyclone with a cut-  
57 off size of 2.5 µm was fitted to remove coarser particles. An automatic aerosol Nafion dryer was used  
58 at the ACSM inlet to keep the relative humidity of the sampled air below 40 %. The sampling inlet  
59 was installed on the roof directly above the instrument, giving the residence time of around 5 s in the  
60 sampling line. ACSM was operated at a 10-time resolution during both winters, then averaged to an  
61 hourly interval. The PM<sub>2.5</sub>-Q-ACSM uses a capture vaporizer (CV) to detect PM<sub>2.5</sub>, and the collection  
62 efficiency (CE) taken is 1<sup>18</sup>.

63 The ionization efficiency (IE) of NO<sub>3</sub> and relative ionization efficiencies (RIE) of NH<sub>4</sub> and SO<sub>4</sub> were  
64 estimated following the procedure suggested by Crenn et al. (2015)<sup>19</sup>. A differential mobility analyser  
65 (DMA) was used to select monodisperse 300 nm particles of NH<sub>4</sub>NO<sub>3</sub> and (NH<sub>4</sub>)<sub>2</sub>SO<sub>4</sub> size within a  
66 wide range of concentrations. The particles were sampled into a condensation particle counter (CPC)  
67 and the ACSM.

68 Using the mass computed using the known particle size and the number concentrations from CPC, t  
69 he response factors of ACSM were compared to determine IE. The calibration values are given in  
70 table S2.

71 0.28 lpm of the ambient air was drawn into the SMPS following the drying through Nafion dryer.  
72 Further days hours with less than 75 % of the data were removed from the analysis. Measurements

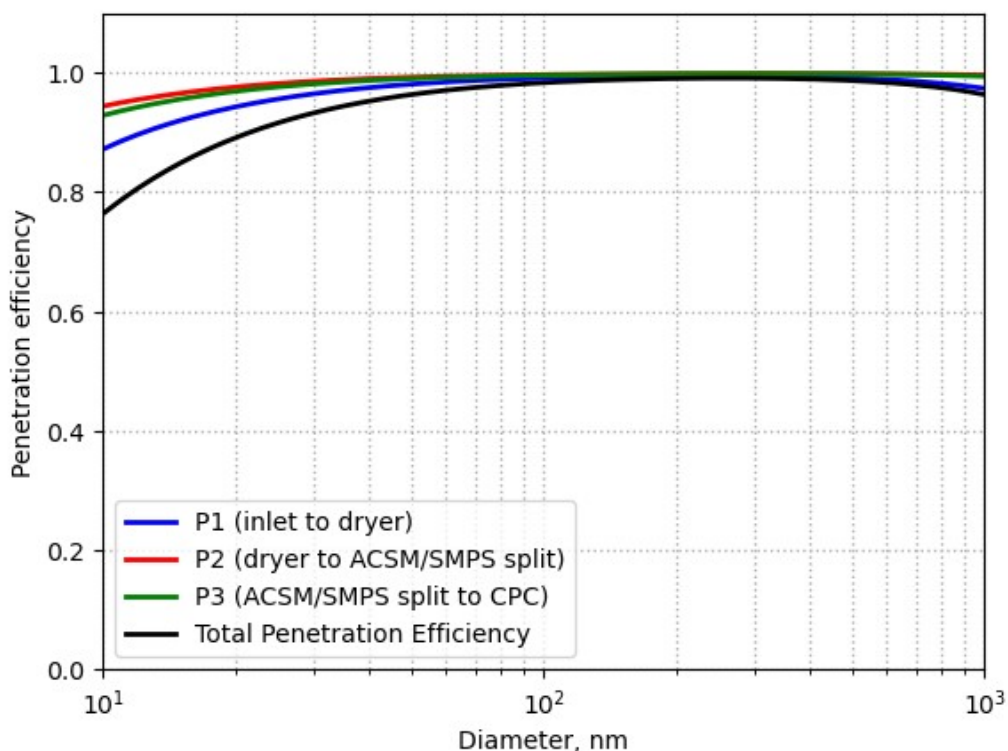

Figure S2: Transmission efficiency of the sampling line, computed for both diffusion<sup>21</sup> and settling<sup>20</sup> losses.

73 during rainy days were not considered for analysis. The diffusion and settling losses of particles in  
74 sampling lines were estimated using the calculations.<sup>20,21</sup> We adjusted the measured PNSDs to  
75 account for the losses in transmission efficiency (Figure S2). Subsequently, we determined the total  
76 and number of concentrations for each size mode. Additionally, we calculated the median diameter  
77 using the updated PNSDs. The quality check of data included cleaning the data, removing outliers,  
78 and discarding abnormal datasets.

### 79 S3. Density and mass closure

80 We estimated the mass concentration of PM<sub>1</sub> from the PNSD measurements of SMPS using a constant  
81 density. In this study, the density of PM<sub>2.5</sub>, including the non-refractory portion of aerosols and black  
82 carbon (BC), was estimated to be approximately 1.6 g/cm<sup>3</sup>. Previous studies in Asia<sup>22–24</sup> reported aerosol  
83 densities between 1.3 and 1.6 g/cm<sup>3</sup>, while<sup>25</sup> used a density of 1.7 g/cm<sup>3</sup> for aerosol mass calculations  
84 in Delhi. In this study we have used a density of 1.6 g/cm<sup>3</sup>. This density provides a good mass closure,  
85 as evident from the plot of PM<sub>2.5</sub> vs. PM<sub>1</sub> (Figure S3). PM<sub>2.5</sub> and PM<sub>1</sub> are in good agreement. There are  
86 some points when PM<sub>1</sub> was greater than PM<sub>2.5</sub> however we have removed them from our analysis.

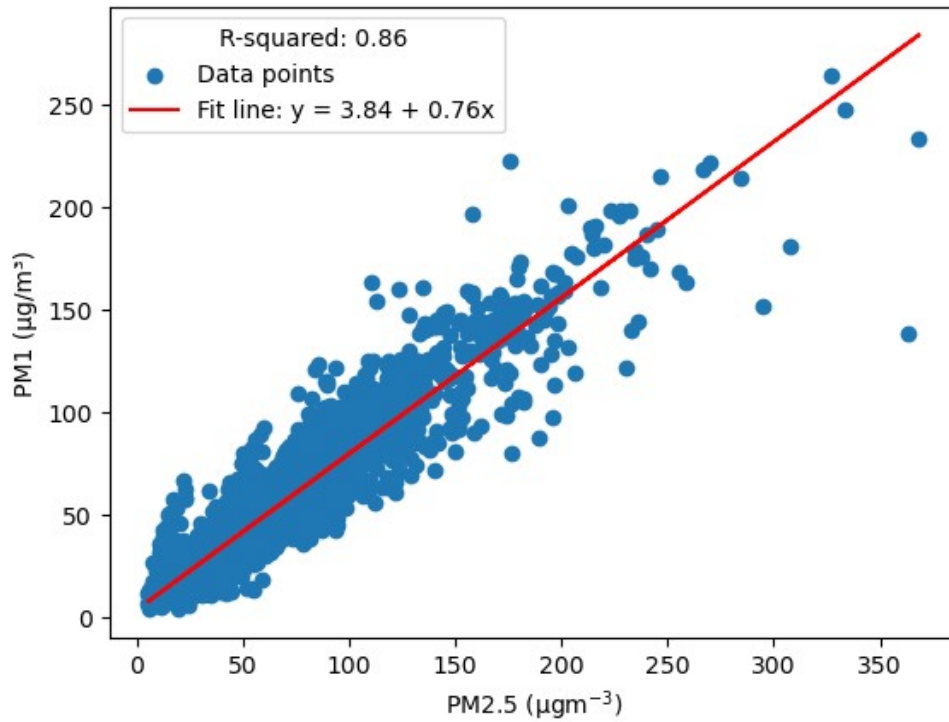

Figure S3: Scatter plot between  $PM_1$  (calculated using SMPS PNSD assuming a density of 1.6 g/cc) and  $PM_{2.5}$  (NR- $PM_{2.5}$  + BC).

87

88

89

90

91

#### 92 **S4. ALWC Measurement**

93 The ISORROPIA II model ignores curvature and surface tension effects and assumes that aerosol  
 94 water intake does not affect ambient water vapor pressure, resulting in aerosol water activity ( $a_w$ )  
 95 equalling RH. The ZSR mixing rule<sup>26</sup> is used to calculate ALWC.

$$96 \quad ALWC = \sum \frac{M_i}{m_{oi}(a_w)} \quad (S1)$$

97 where ALWC denotes the condensed aerosol water mass concentration ( $\text{kg m}^{-3}$  air),  $M_i$  denotes the  
 98 concentration of  $i^{\text{th}}$  component ( $\text{mol m}^{-3}$  air), and  $m_{oi}(a_w)$  is the molality of an aqueous binary solution  
 99 of the  $i^{\text{th}}$  electrolyte with the same  $a_w$  (i.e., relative humidity) as the multicomponent solution.

100 For organics, the following equation was used to calculate the contribution to ALWC:

$$101 \quad W_o = \frac{m_{org}\rho_w}{\rho_{org}} \frac{\kappa_{org}}{(1/RH - 1)} \quad (S2)$$

102 Where  $m_{org}$  denotes the organics mass concentration as measured by ACSM,  $\rho_w$  ( $1 \text{ g/cm}^3$ ) and  $\rho_{org}$   
 103 ( $1.5 \text{ g/cm}^3$ ) represent the densities of water and organics, respectively, and  $\kappa_{org}$  denotes the

104 hygroscopicity of organic aerosols taken as 0.1. The uncertainties related to hygroscopicity of  
105 organics have been discussed in our other paper.<sup>27</sup>

#### 106 **S5. Source apportionment of analysis of organics using positive matrix factorization (PMF)**

107 Source apportionment (SA) through a positive matrix factorization (PMF) was performed on the mass  
108 spectra of the OA aerosol in each season individually to gain insights into the effect sources and  
109 atmospheric processes on OA. SA of OA aerosols was deconvoluted into five factors in the summer  
110 and winter seasons, while 3-factor solution was identified in the post monsoon season. The factors  
111 were resolved and identified based on distinct spectral signals in specific factors (Fig. S4). Also, this  
112 spectral factor was correlated with the factor profile of the AMS Spectral Database, which is available  
113 at <http://cires.colorado.edu/jimenez-group/AMSsd/>).

114 The factors resolved in the current analysis are HOA, BBOA, LVOOA1, LVOOA2, and SVOOA in  
115 summer and winter, while in post monsoon, it is deconvoluted into LVOOA1, LVOOA2, and POA.  
116 The HOA factor profile is characterized by the distinct signals of primary alkyl fragments (C<sub>x</sub>H<sub>y</sub>  
117 groups) at m/z 27, 41, 43, 55, 57, 69 and 71. BBOA profile has distinct signals of m/z 60 and m/z 73,  
118 which are linked to the anhydrous sugar signals.<sup>28</sup> SOA factors are characterized by the distinct  
119 signals of the m/z 43 and m/z 44 (C<sub>2</sub>H<sub>3</sub>O<sup>+</sup> and CO<sub>2</sub><sup>+</sup>). These SOA factors are surrogates for the  
120 secondary aerosol formation in the summer and winter. Mass spectra profile factors in different  
121 seasons and details regarding each factor's temporal and diel variation in different seasons are  
122 discussed below (Figure S4).

123 The BBOA factor exhibited discernible marker peaks corresponding to biomass burning markers,  
124 namely m/z 60, 73. The enhanced peaks observed at m/z 60 suggest the presence of Laevoglucosan.  
125 Laevoglucosan is associated with C<sub>2</sub>H<sub>4</sub>O<sub>2</sub><sup>+</sup> (a fragment with a mass of 60) and is frequently  
126 employed as a characteristic marker of biomass burning in ACMS-AMS-based studies.<sup>29</sup> The  
127 biomass burning factor also contributed 65% of the m/z 73 anhydrous sugar signals, which are widely  
128 recognized as reliable indicators of wood-related combustion processes.<sup>28</sup> Resolved HOA factor had  
129 clear spectral markers of primary alkyl fragments like m/z's 41, 43, 55, and 57, which are identified  
130 for the majors for this factor. The LVOOA1 and LVOOA 2 mass spectra are distinguished by distinct  
131 peaks at m/z 44 or CO<sub>2</sub><sup>+</sup>, which are tracer fragments used to label the oxygenated organic aerosol  
132 (OOA).<sup>29</sup> Both OOA-1 and OOA-FW mass spectra demonstrated a significant correlation with low  
133 volatile oxygenated organic aerosol (LVOOA) profiles (Pearson R = 0.93, 0.94 for OOA-1 and OOA-  
134 2, respectively), consistent with standard profiles.<sup>30</sup>



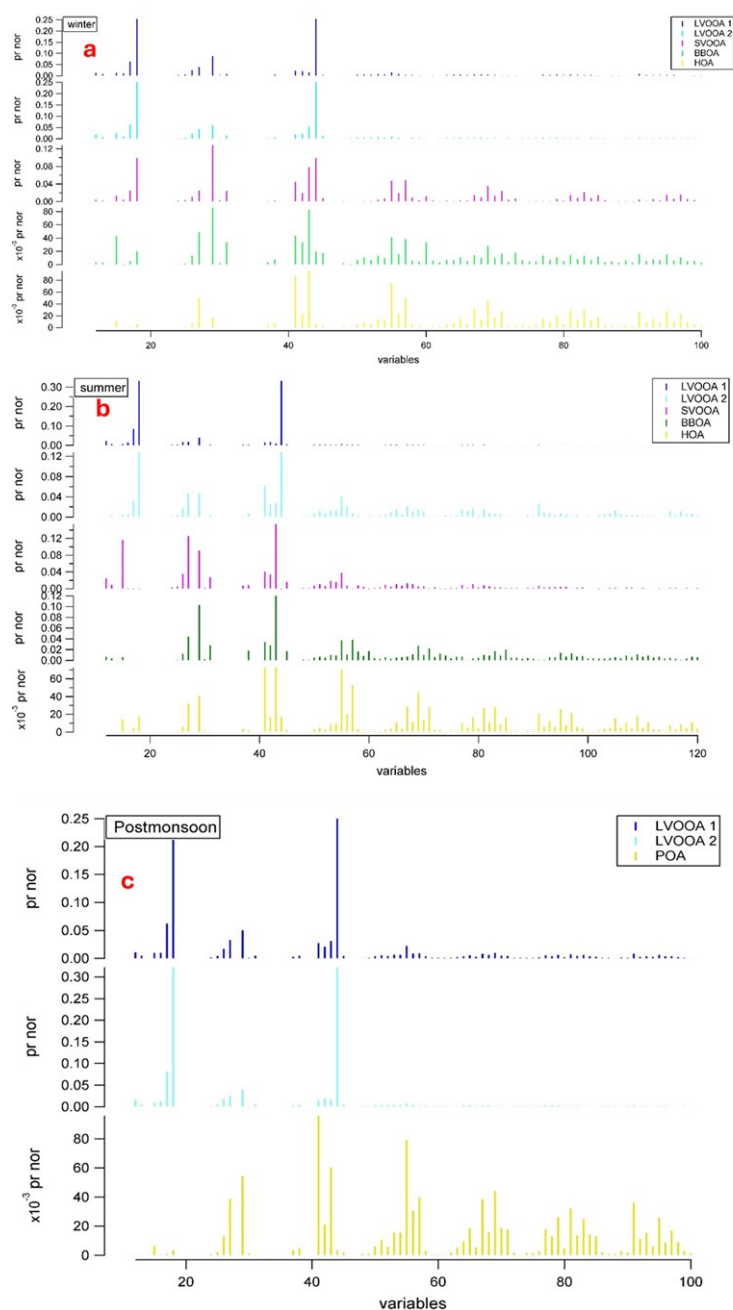

Figure S4: Factor profiles of resolved organic aerosol factors during different seasons.

### 135 S6. NPF Identification

136 In addition to these two features, Delhi being a polluted city with continuous influence of traffic and  
 137 other primary emissions, we also used we plotted temporal variation of primary species, such as black  
 138 carbon, NO<sub>x</sub>, and CO, to rule out the primary emissions as the out the source of new mode of particles.  
 139 <sup>31</sup> We also looked at the time variations of different modes of PNC, with a simultaneous increase in  
 140 the concentration of all modes indicating a change in meteorological conditions or emissions.  
 141 Furthermore, if the particle growth rates in an NPF event can be accurately predicted from the  
 142 temporal evolution of PNSDs, it is categorised as a ‘Type I’ event, otherwise as Type II event. Figure

143 S5 (a -d): Diel variation of trace gas concentrations and meteorological conditions. NPF events were  
 144 classified based on the PNSD in which the appearance of fresh particles in the nucleation mode size  
 145 ranges (<25 nm) showing signs of growth independent of the meteorological conditions during that  
 146 day. Plots of trace gases, mode PNCs and meteorological conditions are given in Figure S5 and S6.  
 147 Furthermore, we used the diel variations of BC to validate the secondary origin of nucleation mode  
 148 particles, as BC serves as an excellent proxy for primary emissions <sup>32,33</sup>. The lack of correlation  
 149 between the peaks in BC and the timing of nucleation events further supports the secondary nature of  
 150 these particles. The diel patterns of BC observed during the selected NPF events, as shown in Figure  
 151 S7, illustrate that the nucleation events occurred independently of the primary emissions typically  
 152 reflected in BC concentrations. This highlights the role of secondary processes in the formation of  
 153 nucleation mode particles.

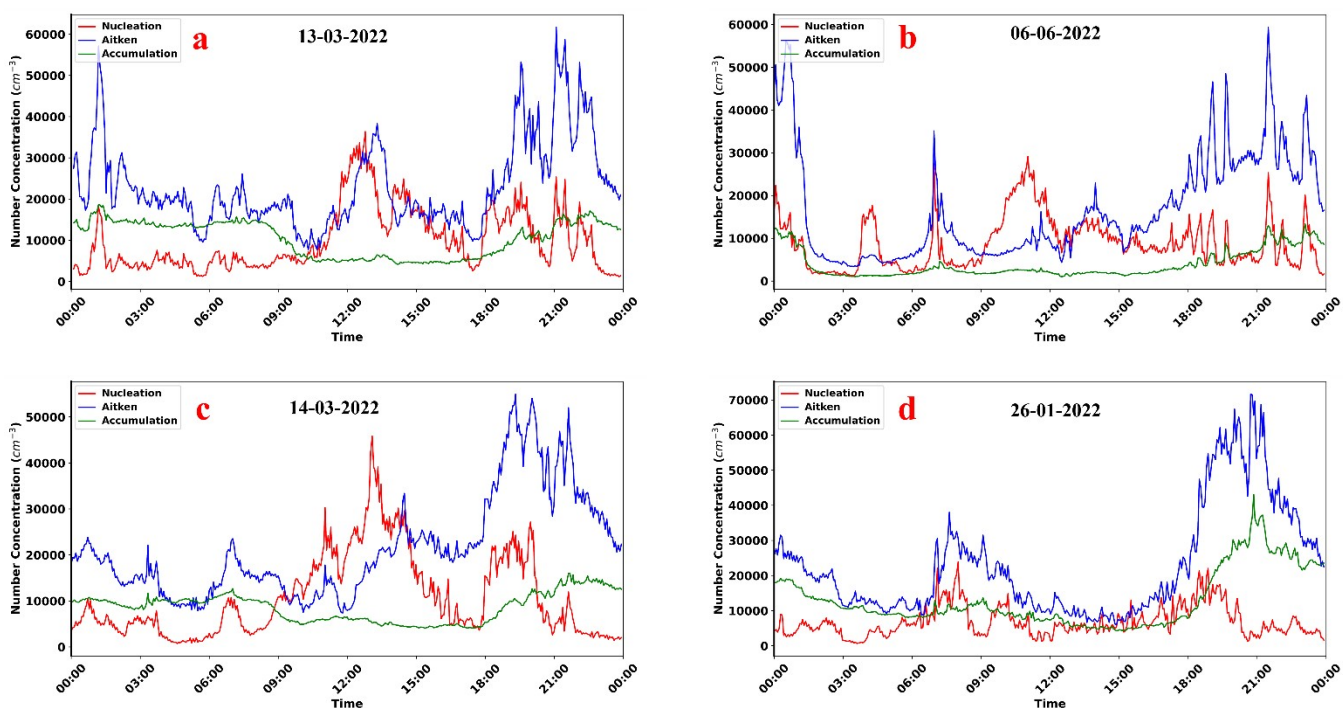

Figure S5: Diurnal variation of PN concentrations of nucleation, Aitken, and accumulation modes. As evident from the first three plots (a, b and c, number concentration of nucleation mode starts shows bursts during daytime on NPF events. In last plot (d), no burst of nucleation is observed during daytime, hence it's a non-NPF event.

154

155

156

157

158

159

160

161

**a**

13-03-2022

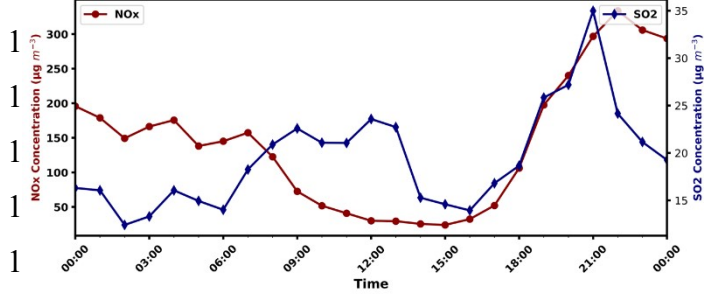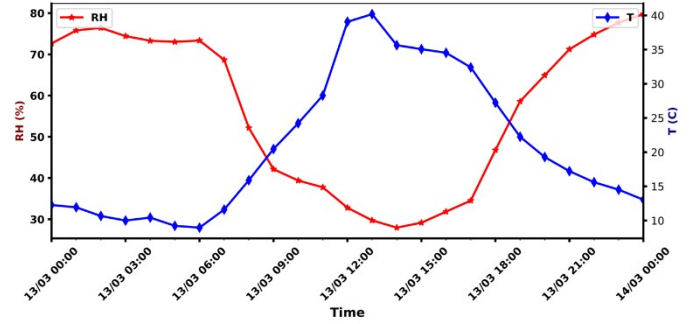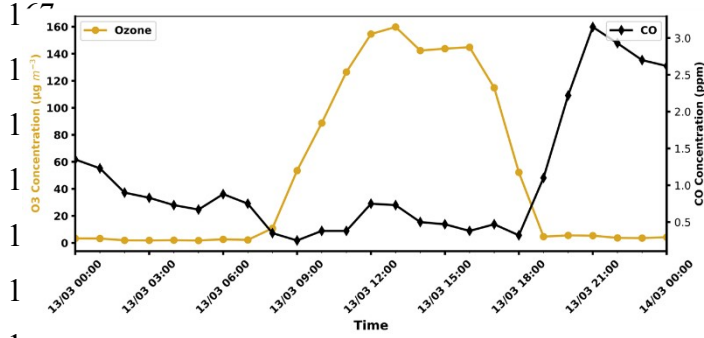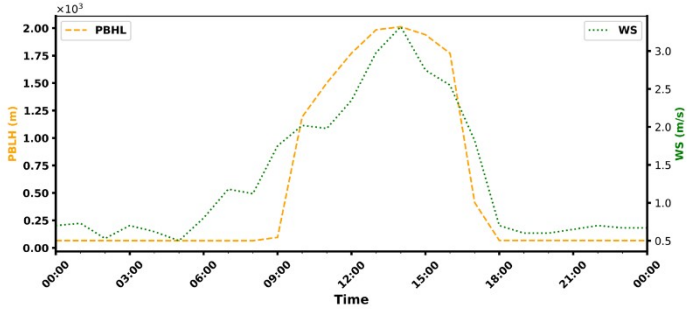

161

162

163

**b**

14-03-2022

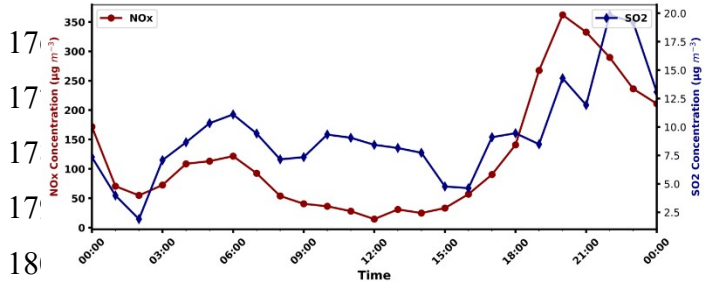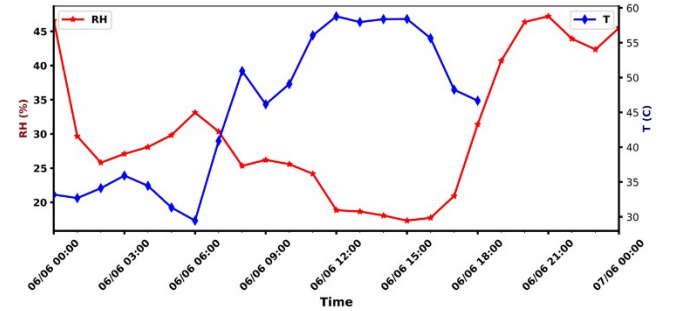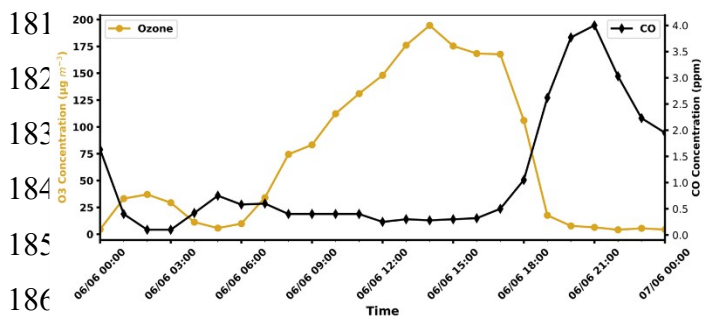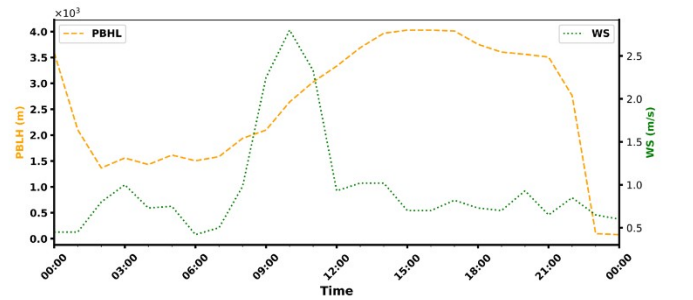

164

165

166

167

168

169

170

171

172

193

c

194

06-06-2022

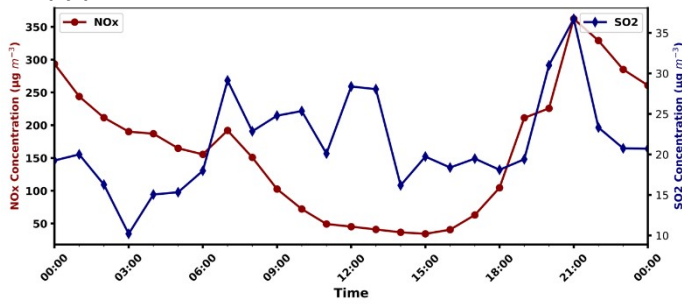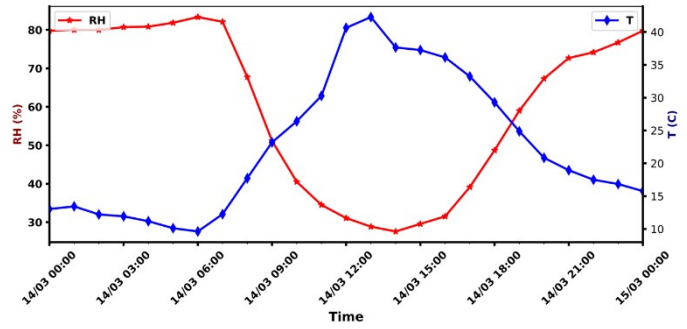

200

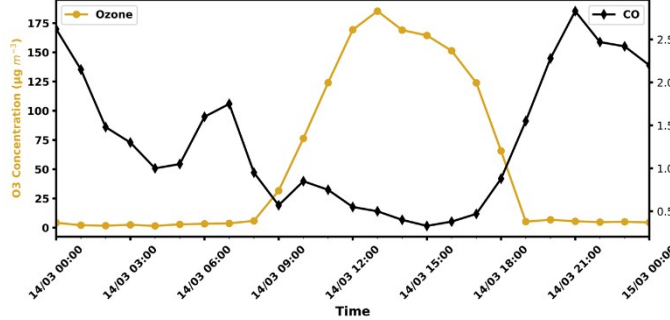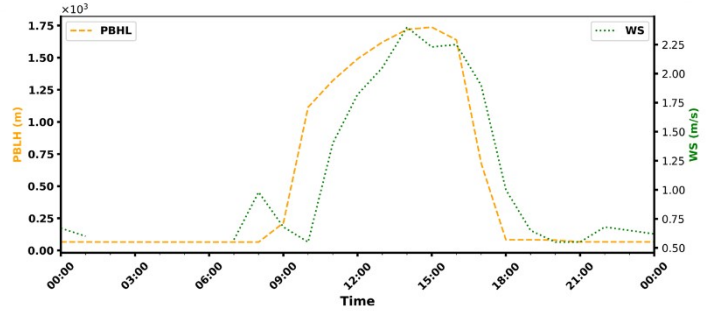

207

208

d

26-01-2022

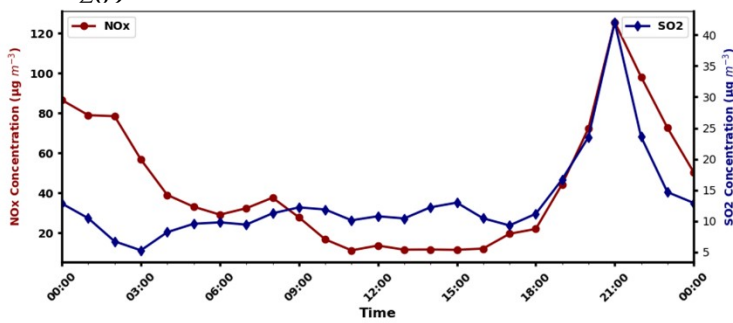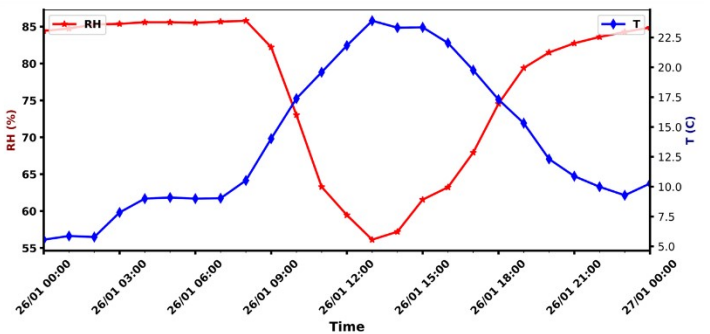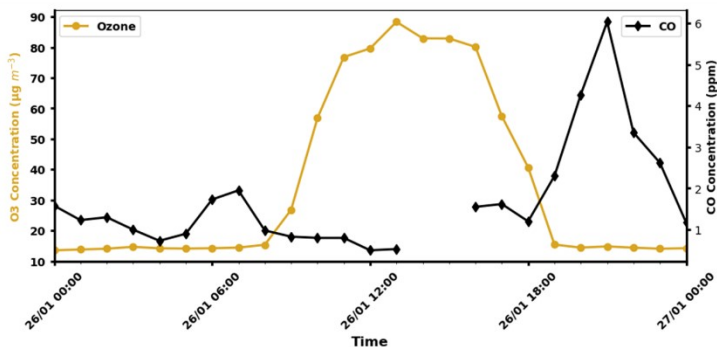

Figure S6 (a -d): Diurnal variation of trace gas concentrations and meteorological conditions. NPF events were classified based on the PNSD in which the appearance of fresh particles in the nucleation mode size ranges (<25 nm) showing signs of growth independent of the meteorological conditions during that day.

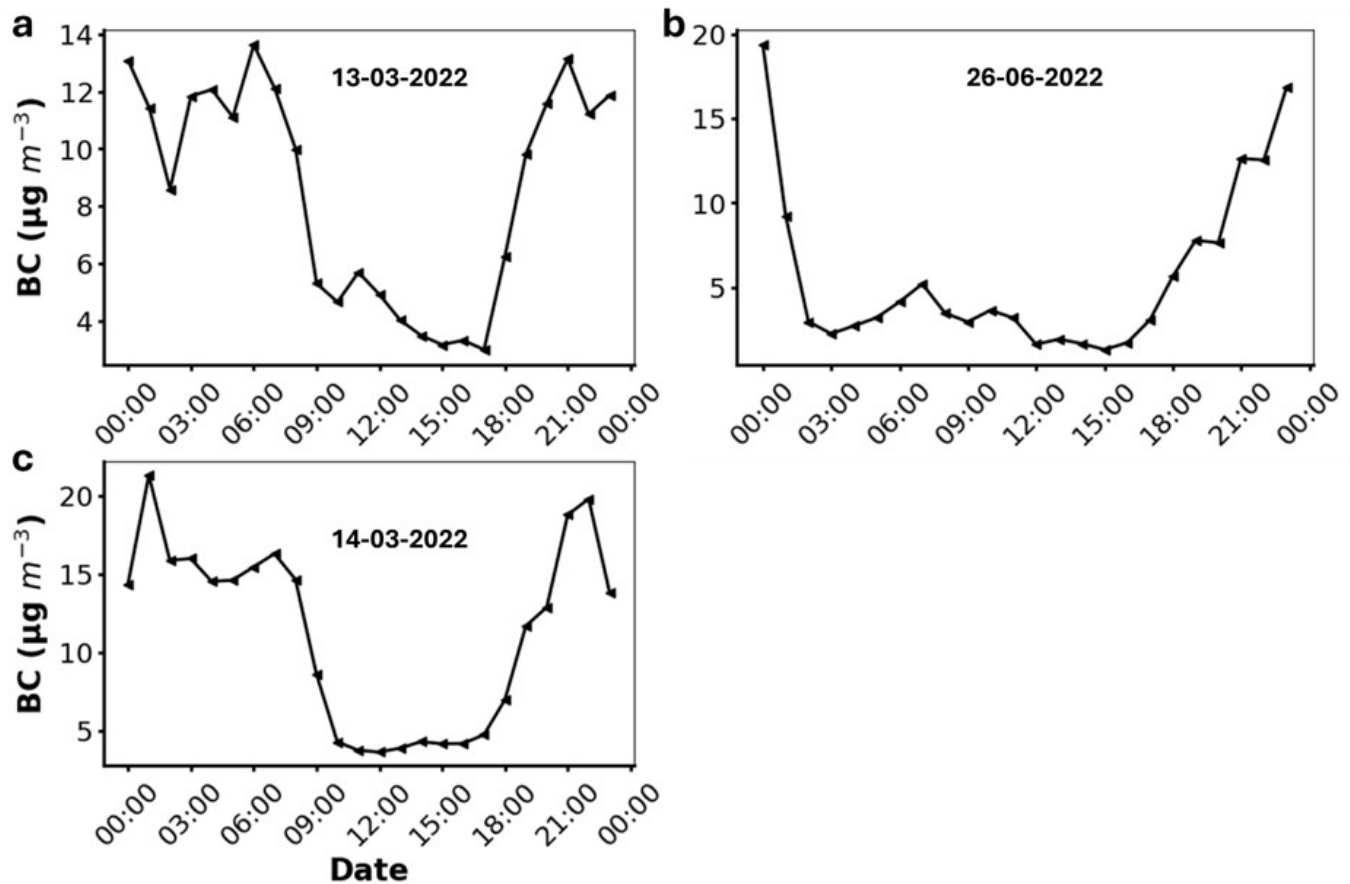

219

220 *Figure S7: Diel variation of Black Carbon (BC) concentrations on selected days. The absence*  
 221 *of significant daytime peaks in BC concentrations, particularly between 9:00 AM and 6:00 PM,*  
 222 *suggests limited influence from secondary formation during the day and reinforces the*  
 223 *identification of BC as a proxy for primary emission sources, largely driven by anthropogenic*  
 224 *activities during nighttime and early morning hours. This pattern closely mirrors the diel profile*  
 225 *of CO, further confirming the primary nature of the observed nucleation events.*

226

### 227 **S7. Apparent Formation rate ( $J_{10}$ )**

228 The apparent formation rate of 10 nm particles ( $J_{10}$ ) was calculated using the following equation<sup>34</sup>:

$$229 \quad J_{10} = \frac{dN_{10-25}}{dt} + CoagS \cdot N_{10-25} + \frac{GR_{10-25}}{15} \cdot N_{10-25} \quad S3$$

230 The right hand side of the Eq. (S3) includes the measured change of the particle concentration per  
 231 time interval (first term), the loss by coagulation scavenging (second term) and the growth out of the  
 232 specific size range at 25 nm (third term). Where,  $N_{10-25}$  is the particle concentration in the 10-25 nm  
 233 range, representing nucleation mode. The GR is the growth rate of nucleation mode particles.

234  $CoagS$  is the coagulation sink for particles of diameter  $D_{pi}$  (representative size of nucleation mode;  
 235 15 nm) and is derived from the size distribution.<sup>35</sup>

$$236 \quad \text{CoagS}_i = \sum_j K_{ij} N_j \quad \text{S4}$$

237 Here  $N_j$  is the particle number concentration of the  $j$  th size bin, and  $K_{ij}$  ( $\text{cm}^3 \text{No}^{-1} \text{s}^{-1}$ ) is the  
 238 coagulation coefficient between particles of the  $j$  th bin (diameter  $D_{pj}$ ) and  $i$  th bin.<sup>36</sup>

$$239 \quad K_{ij} = 2\pi(D_i + D_j)(D_{pi} + D_{pj}) \left( \frac{D_{pi} + D_{pj}}{D_{pi} + D_{pj} + 2(g_i^2 + g_j^2)^{1/2}} + \frac{8(D_i + D_j)}{(\tilde{c}_i^2 + \tilde{c}_j^2)^{1/2}(D_{pi} + D_{pj})} \right)^{-1} \quad \text{S5}$$

240 where

$$\begin{aligned} \tilde{c}_i &= \left( \frac{8kT}{\pi m_i} \right)^{1/2} \\ l_i &= \frac{8D_i}{\pi \tilde{c}_i} \\ g_i &= \frac{\sqrt{2}}{3D_{pi} l_i} \left[ (D_{pi} + l_i)^3 - (D_{pi}^2 + l_i^2)^{3/2} \right] - D_{pi} \\ D_i &= \frac{kTC_c}{3\pi\mu D_{pi}} \end{aligned}$$

241

## 242 S8. H<sub>2</sub>SO<sub>4</sub> estimation

243 Measuring sulfuric acid gases in the lower troposphere is challenging due to their generally low  
 244 ambient concentrations, typically ranging from  $10^6$  to  $10^7$  molecules/cm<sup>3</sup>. Various methods have been  
 245 proposed to estimate ambient sulfuric acid concentrations based on observations such as SO<sub>2</sub>.  
 246 Previous studies<sup>37–39</sup> have suggested different approaches in this regard. For instance, Petäjä et al.  
 247 (2009)<sup>39</sup> introduced a linear method to approximate observed H<sub>2</sub>SO<sub>4</sub> concentration in Hyytiälä,  
 248 southern Finland, while Lu et al. (20119) proposed a nonlinear method, presenting several proxies  
 249 for gaseous sulfuric acid concentration. Their study indicated that compared to the linear method, a  
 250 nonlinear relationship offers more accurate H<sub>2</sub>SO<sub>4</sub> concentration estimates, particularly in Beijing.  
 251 Additionally, Mikkonen et al. (2011)<sup>38</sup> utilized another sulfuric acid nonlinear proxy based on long-  
 252 term observations in various locations. Dada et al (2020)<sup>37</sup> proxies for sulfuric acid (H<sub>2</sub>SO<sub>4</sub>)  
 253 concentrations were derived using measurements from four distinct locations: a boreal forest in  
 254 Hyytiälä, Finland; a rural Mediterranean site in Agia Marina, Cyprus; an urban area in Budapest,  
 255 Hungary; and a megacity in Beijing, China. These proxies were based on a combination of the  
 256 identified sources and sinks of H<sub>2</sub>SO<sub>4</sub>.

257 Despite their utility, these methods carry significant uncertainties, as few studies have explored their  
 258 accuracy across diverse locations, and none have been tested in complex environments like Delhi.

259 Despite these limitations, we have utilized the proxy provided by Dada et al. (2020)<sup>37</sup>, which aligns  
260 with measurements in Beijing, a city resembling Delhi regarding complexity and pollution levels.

## 261 **S9. Estimating Hygroscopic Growth Factors**

262 **Mass-Based Hygroscopic Growth Factor** ( $G_f(\text{mass based})$ ): The size-based hygroscopic  
263 based growth factors ( $G_f$ ) is defined as the the ratio of size of the wet aerosol particle to the  
264 size of the aerosol particle particle at dry conditions (RH < 20%). It's a function of chemical  
265 composition, RH and initial size of the dry particle. In our case we don't have the measurements  
266 of hygroscopic growth factor, so employed a different approach to estimate the hygroscopic  
267 growth factor. First we estimated ALWC using the ISSOROPIA II as discussed in section S4.  
268 Then the mass based hygroscopic size growth factor was estimated as;

$$269 \quad G_f(\text{mass based}) = \frac{PM_{2.5} + ALWC}{PM_{2.5}} \quad \text{S6}$$

270 Where  $PM_{2.5}$  is the dry aerosol mass at a particular RH condition and ALWC is the aerosol  
271 liquid water content associated with  $PM_{2.5}$  at those RH conditions.

272

## 273 **Size-Based Hygroscopic Growth Factor ( $G_f$ ):**

274 Since particle density changes with water absorption, we need to account for this to estimate  
275 the size-based hygroscopic growth factor. The size-based growth factor ( $G_f$ ) is calculated  
276 using:

$$277 \quad G_f = \frac{G_f(\text{mass - based})^{\frac{1}{3}} \times \rho_{dry} \times G_f(\text{mass - based})}{\rho_{dry} + \rho_{water} \times (G_f(\text{mass - based}) - 1)} \quad \text{S7}$$

278 Where  $\rho_{dry}$  is the density of dry  $PM_{2.5}$  estimated as  $1.6 \text{ g cm}^{-3}$  based on the chemical  
279 composition of  $PM_{2.5}$  and  $\rho_{water}$  is the density of water taken as  $1 \text{ g cm}^{-3}$ .

280 This method estimates the hygroscopic growth of bulk  $PM_{2.5}$ , without considering size-specific  
281 effects, using the chemical composition used was average daytime chemical composition of  
282  $PM_{2.5}$ .

283 The plot of hygroscopic growth vs RH is shown in the figure S18.

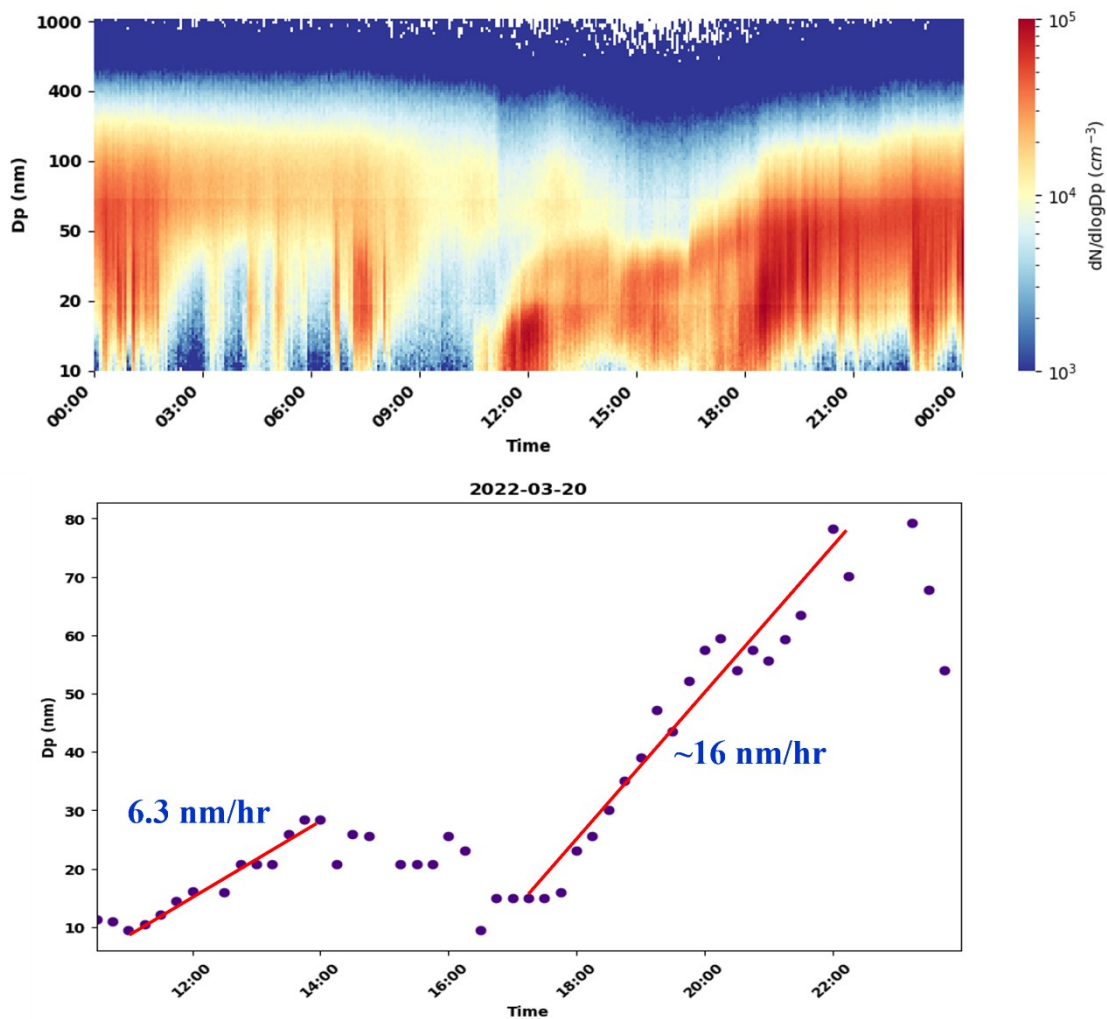

Figure S8: Daytime growth rate of nucleation mode particles calculated as the slope of a linear fit to the geometric mean of nucleation mode particles over time. The plot also shows a more rapid growth rate of particles observed during the evening hours, calculated similarly.

284  
 285  
 286  
 287  
 288  
 289  
 290  
 291  
 292  
 293  
 294  
 295



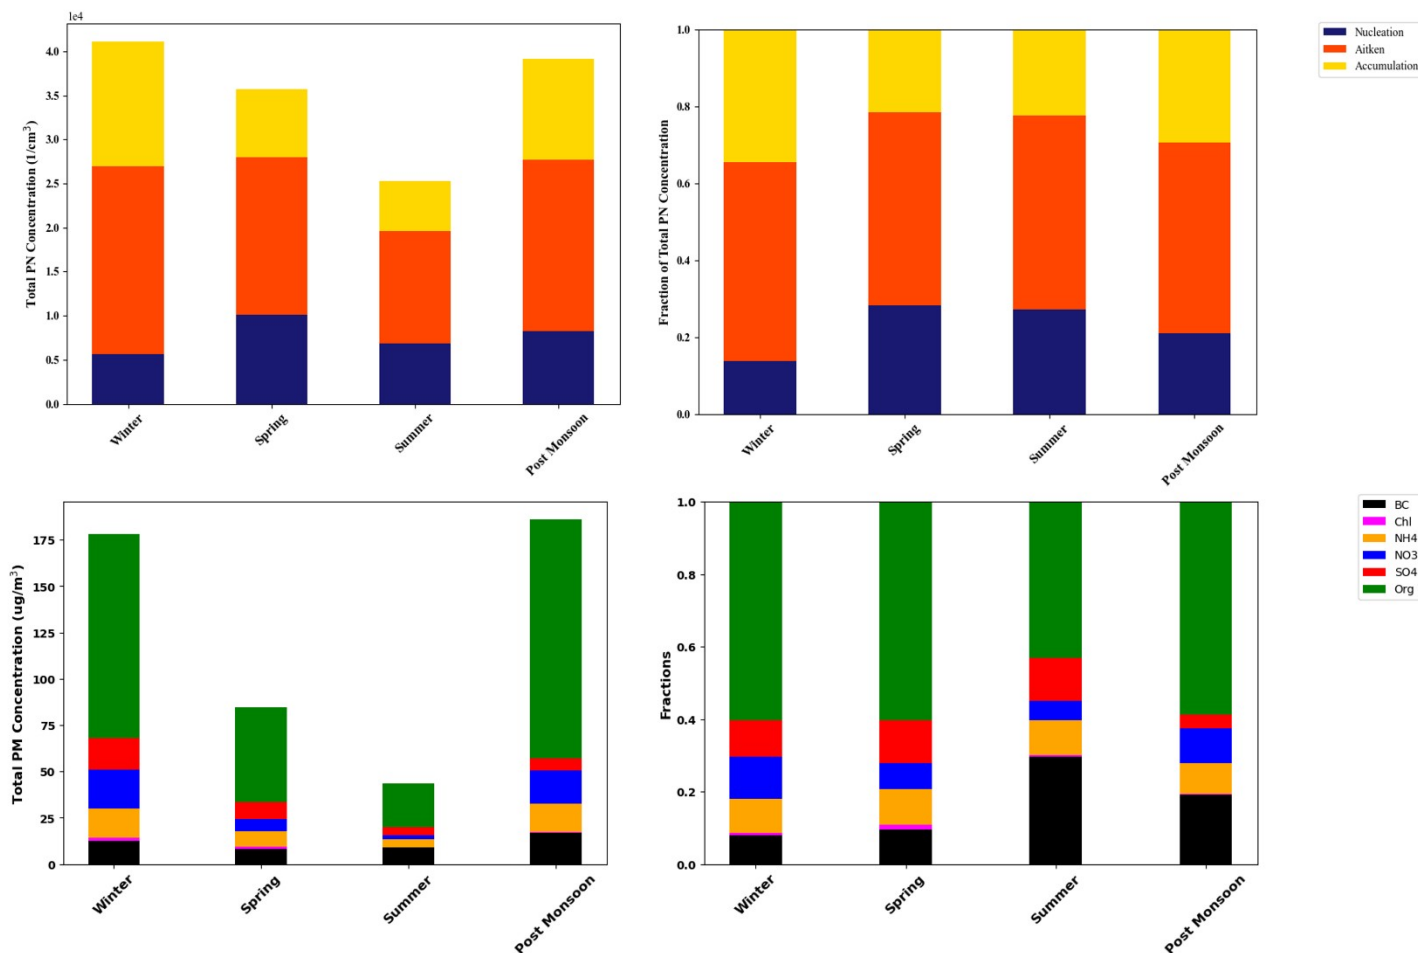

Figure S9: Average particle number (PN) and  $PM_{2.5}$  levels for each season by mode and components, respectively.. The modes are based on scanning mobility particle sizer (SMPS) observations, namely nucleation (10-25 nm), Aitken (25-100 nm), and accumulation (100-1000 nm) modes. The  $PM_{2.5}$  species are organics (Org), chloride (Chl), ammonium ( $NH_4$ ), nitrate ( $NO_3$ ), sulfate ( $SO_4$ ), and black carbon (BC).

Quantitative analysis of the plots reveals that PN levels follow the seasonal trends of  $PM_{2.5}$  levels but not in a directly proportional manner. During the winter season, PN levels reach approximately  $40,000\text{ cm}^{-3}$  while  $PM_{2.5}$  levels are around  $175\text{ }\mu\text{g}/\text{m}^3$ . In the spring, PN levels decrease to about  $30,000\text{ cm}^{-3}$  as  $PM_{2.5}$  levels drop to approximately  $125\text{ }\mu\text{g}/\text{m}^3$ . The summer season shows a further reduction in both, with PN levels around  $20,000\text{ cm}^{-3}$  and  $PM_{2.5}$  levels at about  $50\text{ }\mu\text{g}/\text{m}^3$ . Post-monsoon, PN levels rise again to around  $35,000\text{ cm}^{-3}$ , similar to winter levels, whereas  $PM_{2.5}$  levels return to approximately  $175\text{ }\mu\text{g}/\text{m}^3$ .

However, the proportional changes are not consistent. For instance, while the PN levels in winter are about twice those in summer, the  $PM_{2.5}$  levels in winter are more than three times the summer levels. This indicates that while PN levels and  $PM_{2.5}$  levels exhibit parallel seasonal trends, the changes in PN levels are less pronounced compared to the changes in  $PM_{2.5}$  levels across different seasons.

296

297

298

299

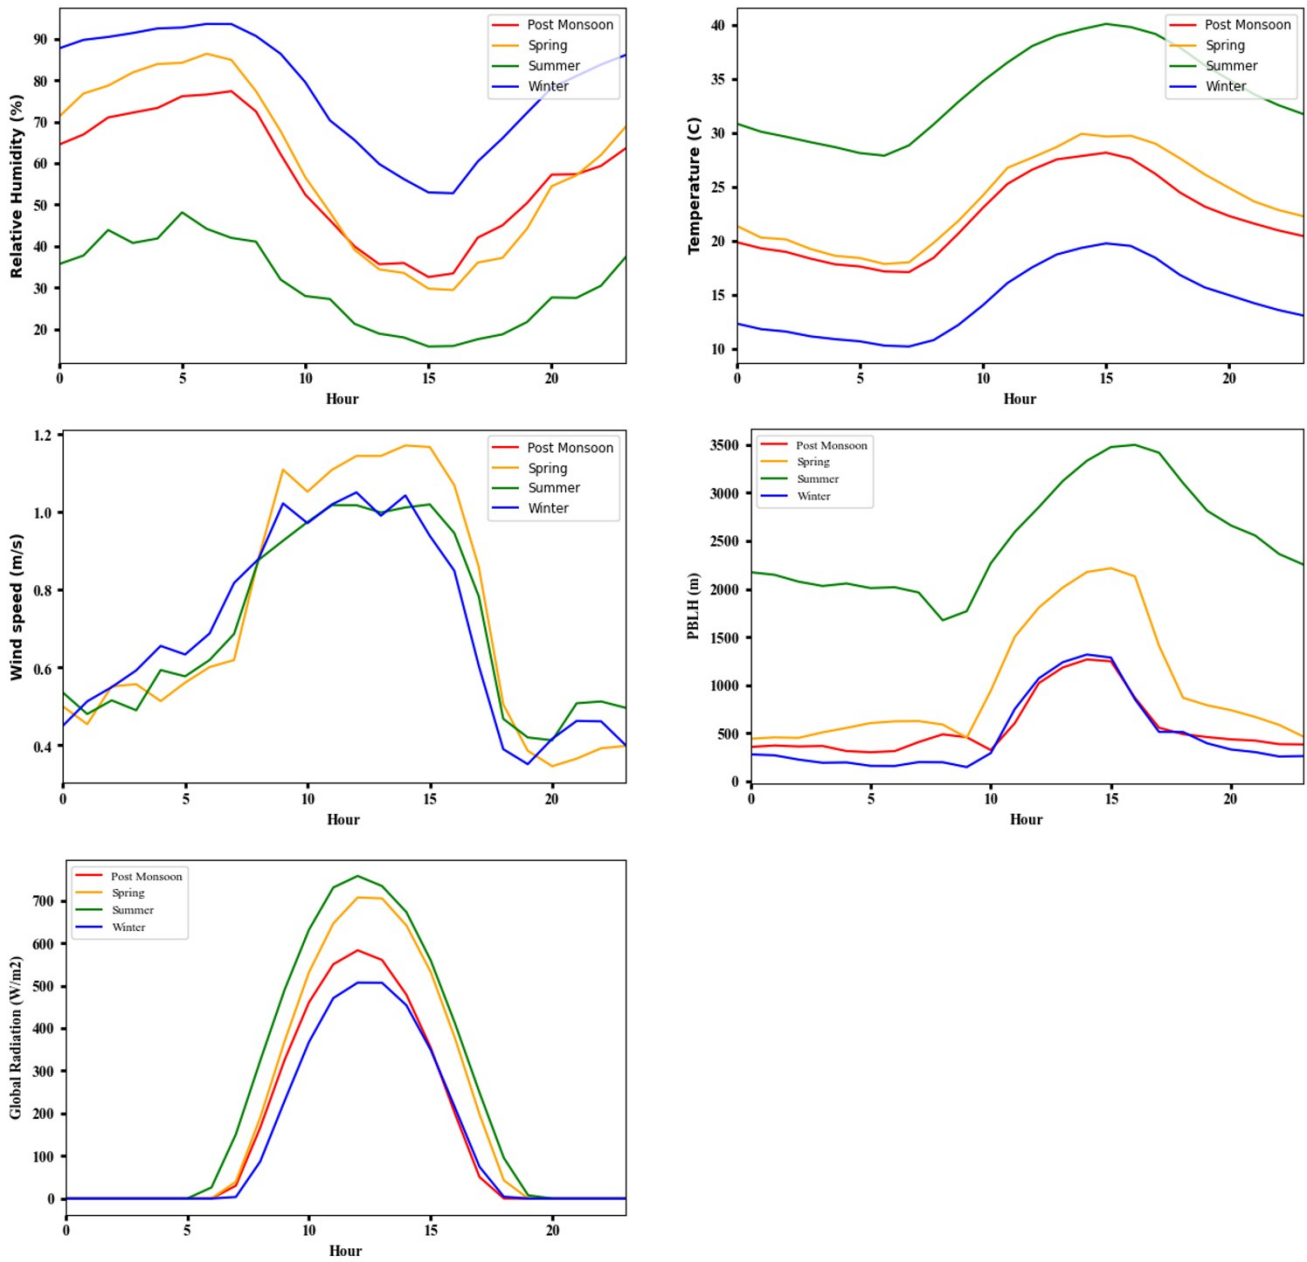

Figure S10: Diurnal variation of meteorological parameters during different seasons.

300

301

302

303

304

305

306

307

308

309

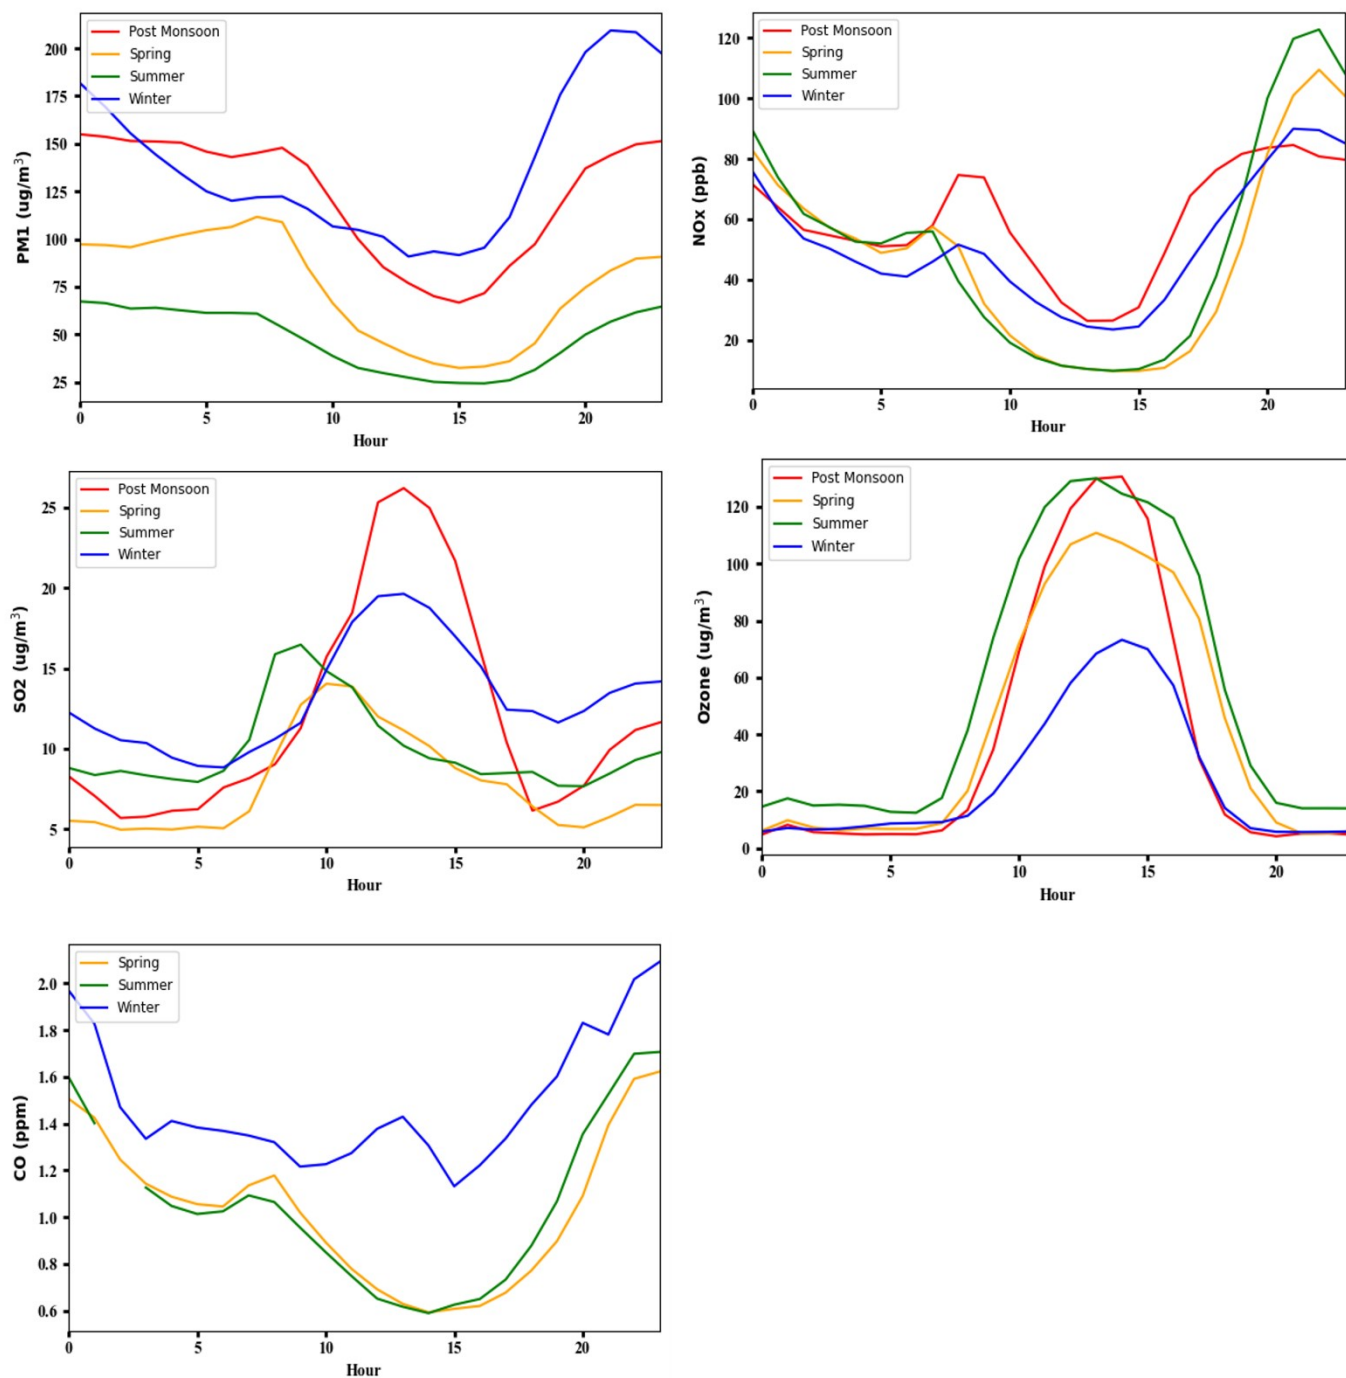

Figure S11: Diurnal variation of trace pollutants during different seasons.

310

311

312

313

314

315

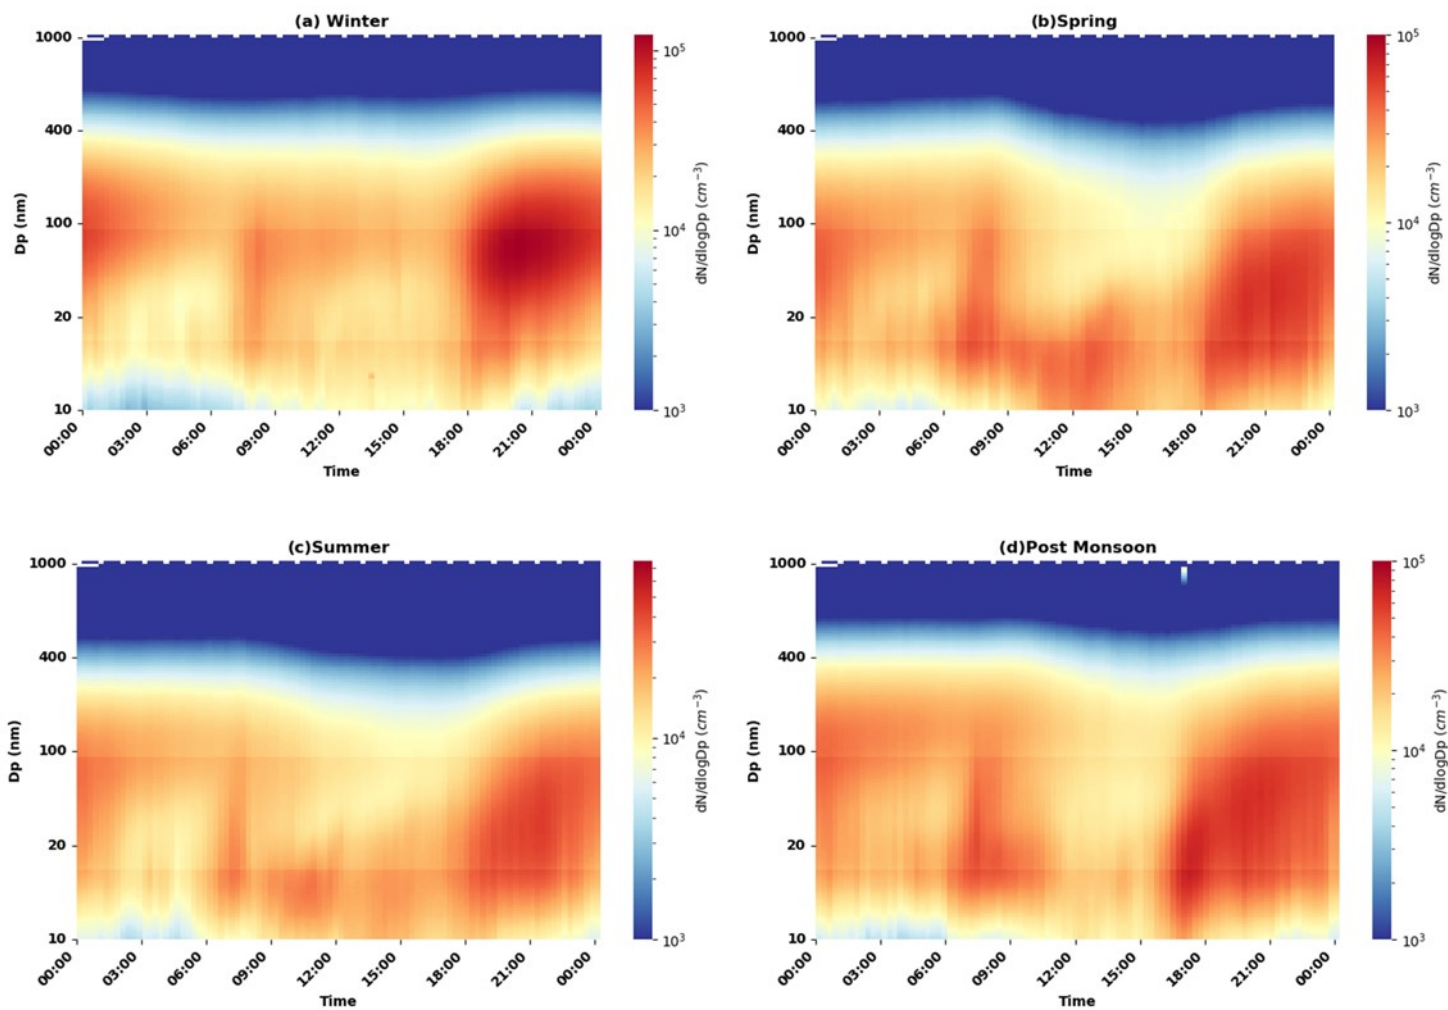

Figure S12: PNSD Heatmaps during different seasons. On y-axis is particle diameter ( $D_p$ ), on x-axis is time of the day and colour intensity represent particle number concentration.

316

317

318

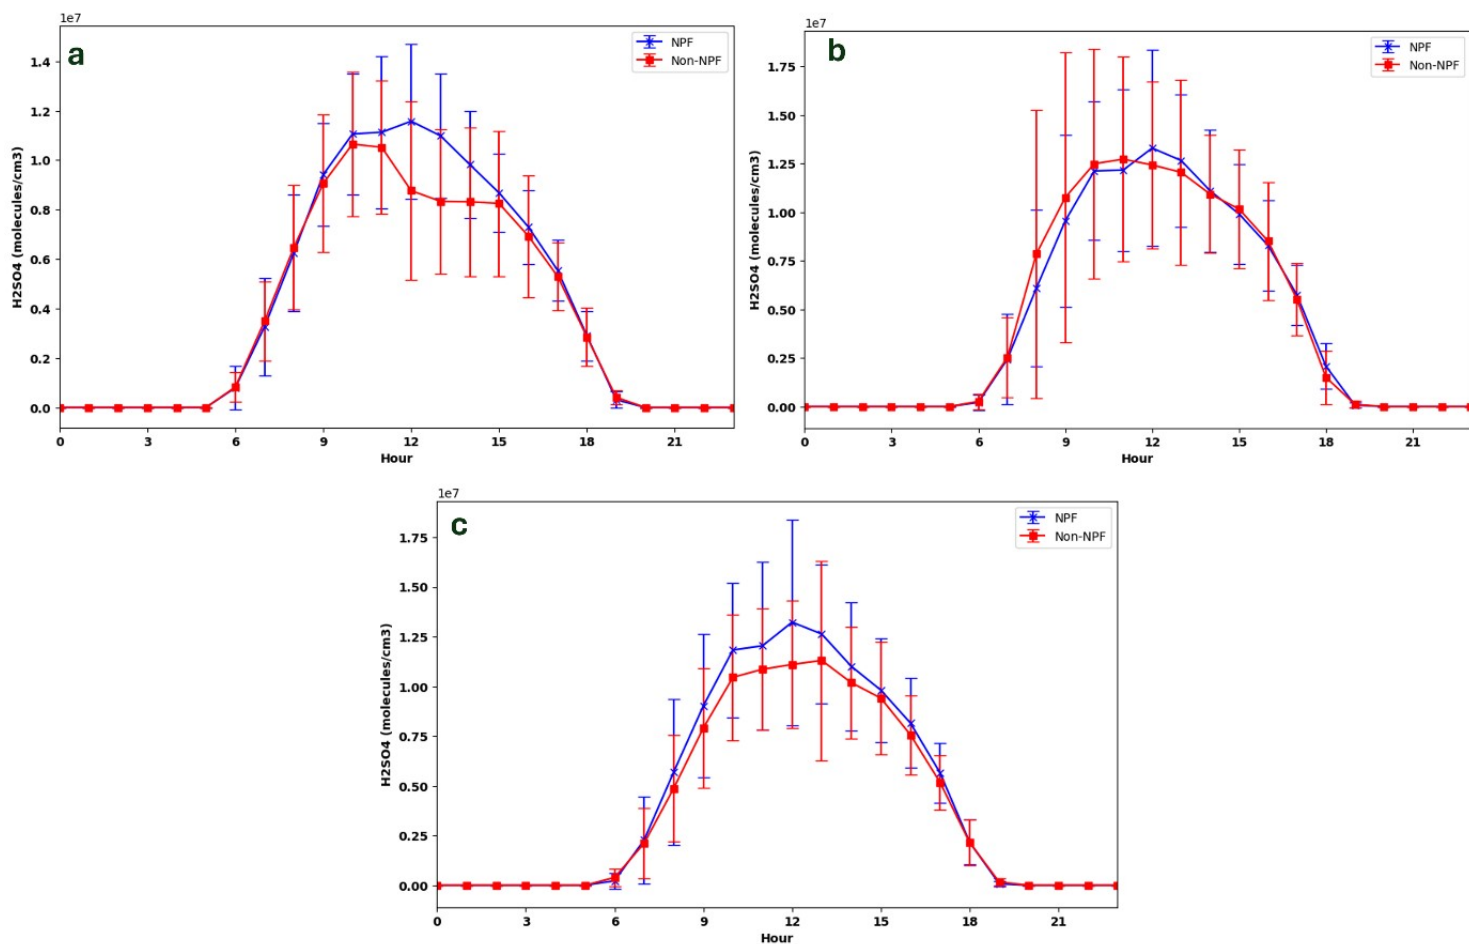

Figure S13:(a and b) Comparison of average daytime hours variation of  $\text{H}_2\text{SO}_4$  proxy concentration between NPF and non-NPF days during low CS ( $<0.03\text{ s}^{-1}$ ) and medium CS (0.03 to  $0.06\text{ s}^{-1}$ ); (c) Comparison of average daytime hours variation of  $\text{H}_2\text{SO}_4$  proxy concentration between NPF and non-NPF days spring and summer seasons only when most of observed our NPF events occurred.

319

320

321

322

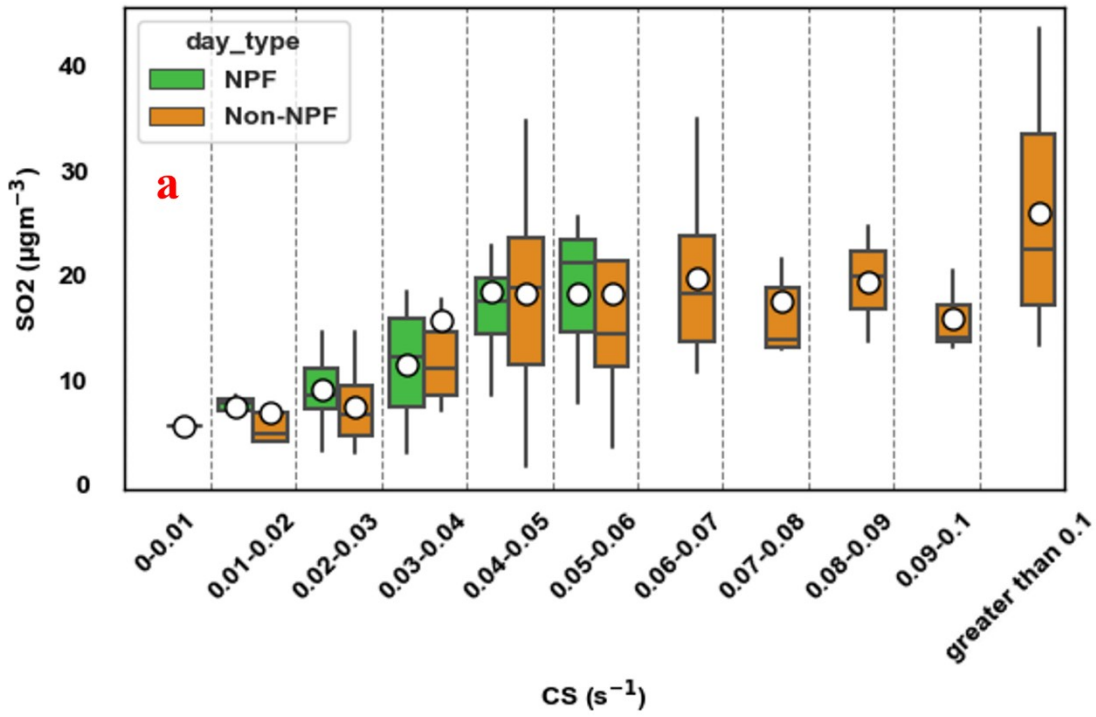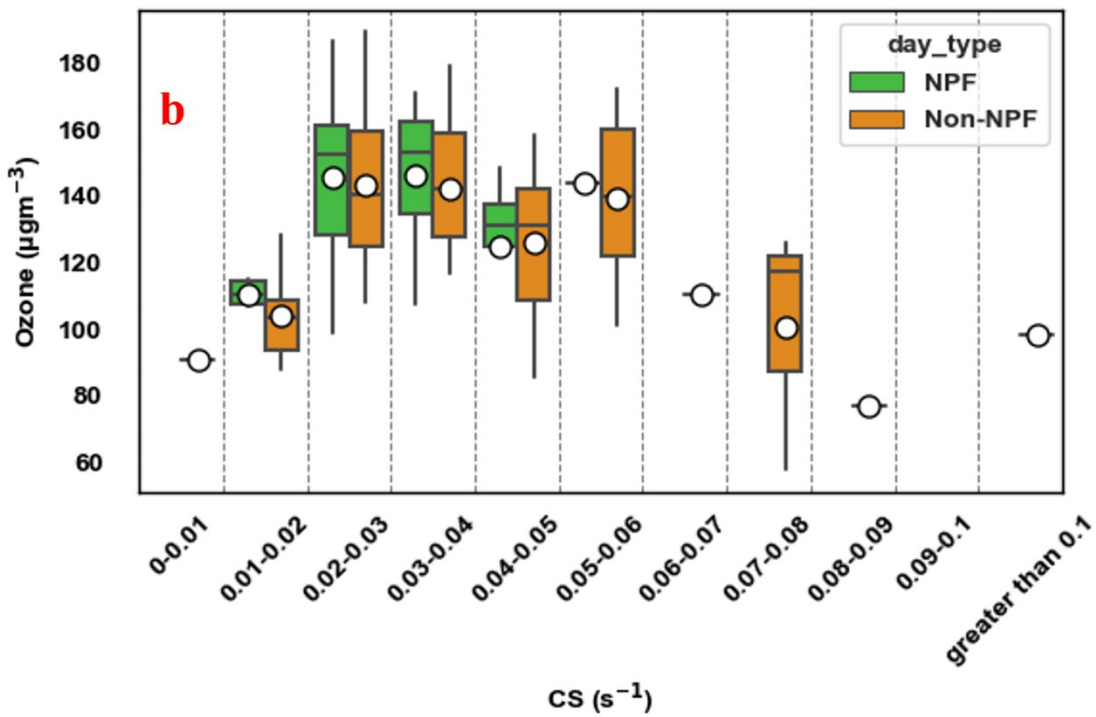

Figure S14: (a and b) Average daily variation of SO<sub>2</sub> and Ozone versus CS (s<sup>-1</sup>). Each data point represents the average of the variable from 10:00 to 16:00 local time (LT).

323

324

Figure S15: The relationship between nucleation rate ( $J_{1.5}$ ) and sulfuric acid concentration  $[H_2SO_4]$  under different precursor conditions at 293 K. The blue line represents the nucleation rate for the system with sulfuric acid, dimethylamine (DMA), and ammonia ( $NH_3$ ), while the green line represents the system with sulfuric acid and ammonia only.

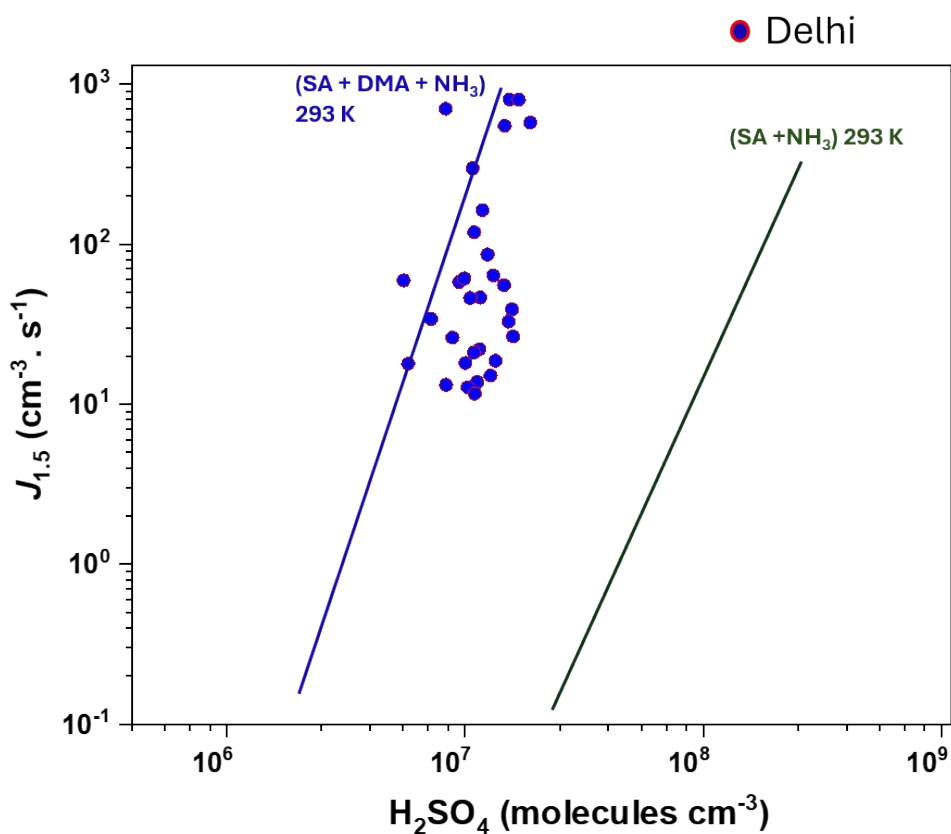

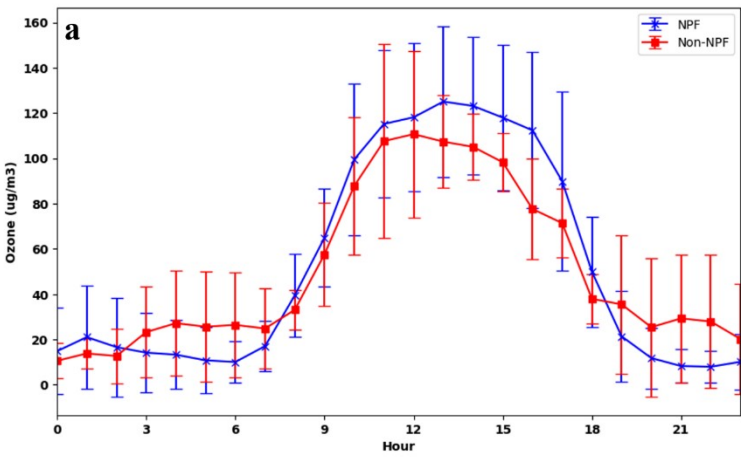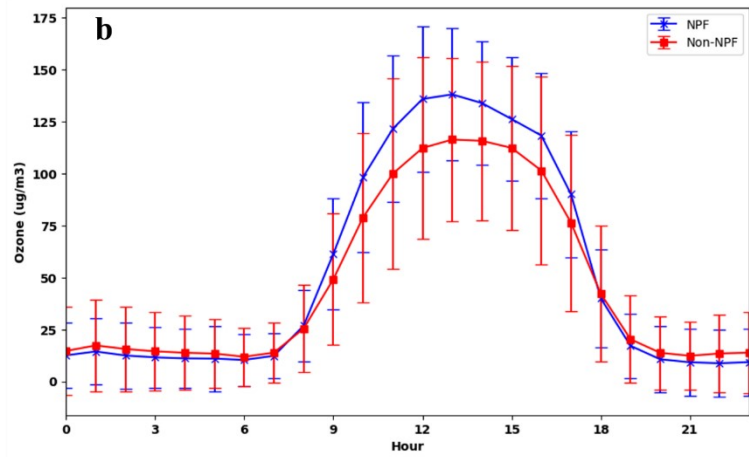

326

Figure S16: (a and b) Comparison of average diurnal variation of measured ozone concentration between NPF and non-NPF days during low CS ( $<0.03\text{ s}^{-1}$ ) and medium CS ( $0.03\text{ to }0.06\text{ s}^{-1}$ ).

327

328

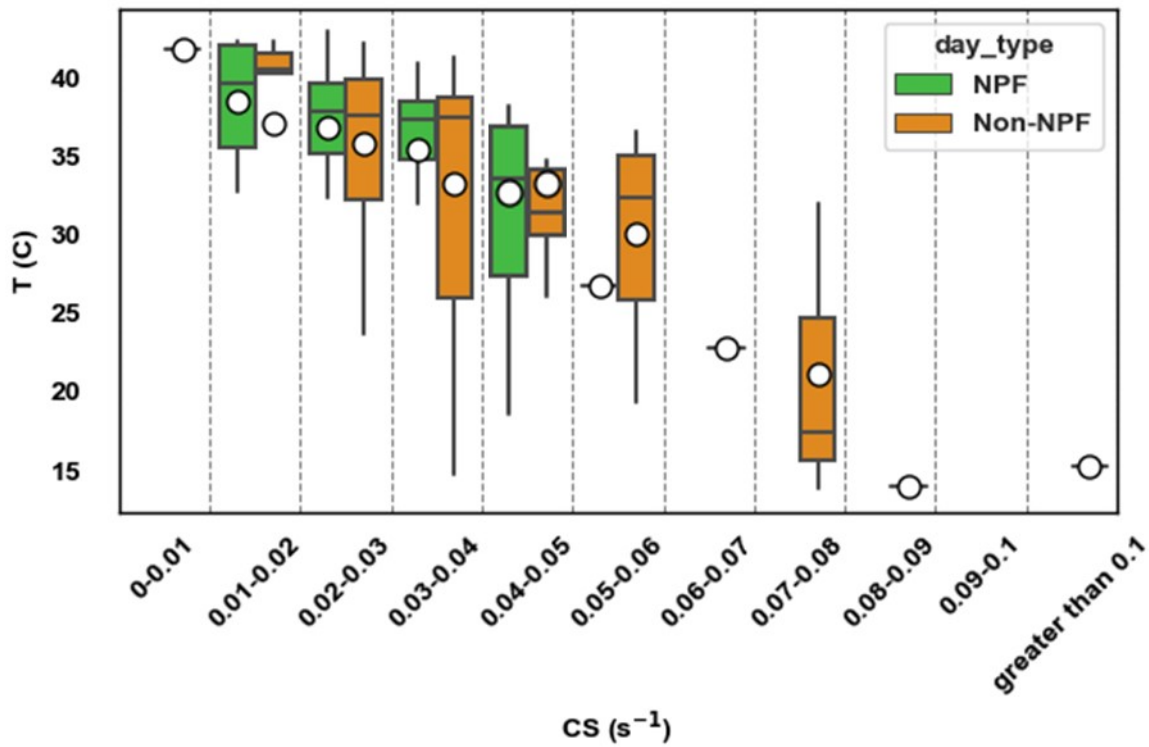

Figure S17: (a and b) Average daily variation of  $T$  versus  $CS$  ( $\text{s}^{-1}$ ). Each data point represents the average of the variable from 10:00 to 16:00 local time (LT).



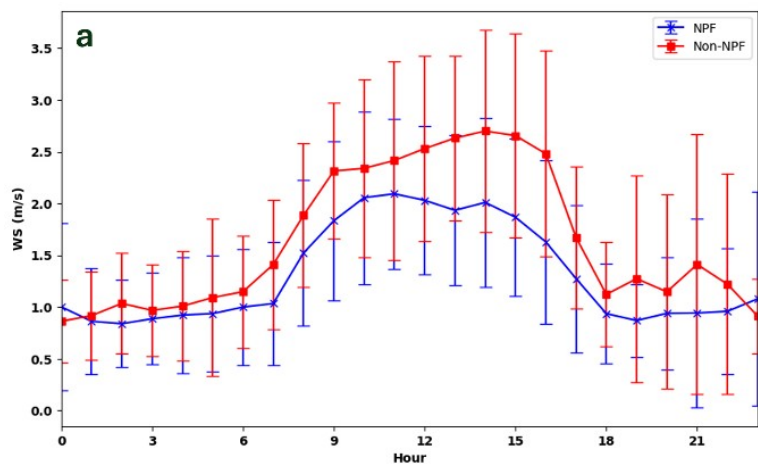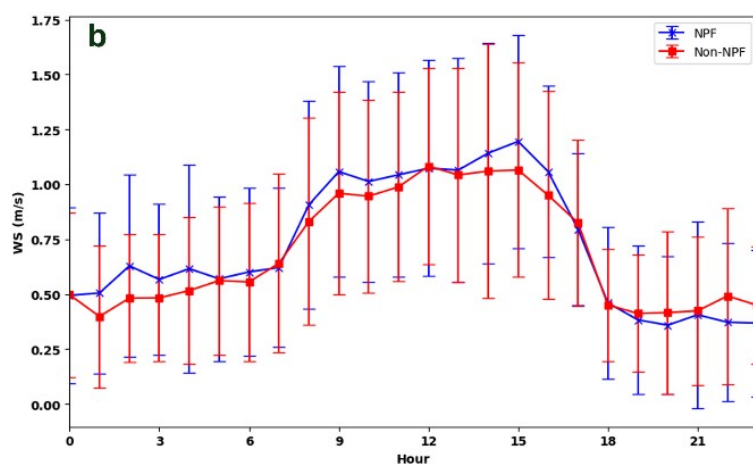

329

Figure S18: (a and b) Comparison of average diel variation of wind speeds (WS) concentration between NPF and Non-NPF days during low CS ( $< 0.03 \text{ s}^{-1}$ ) and medium CS ( $0.03 \text{ to } 0.06 \text{ s}^{-1}$ ).

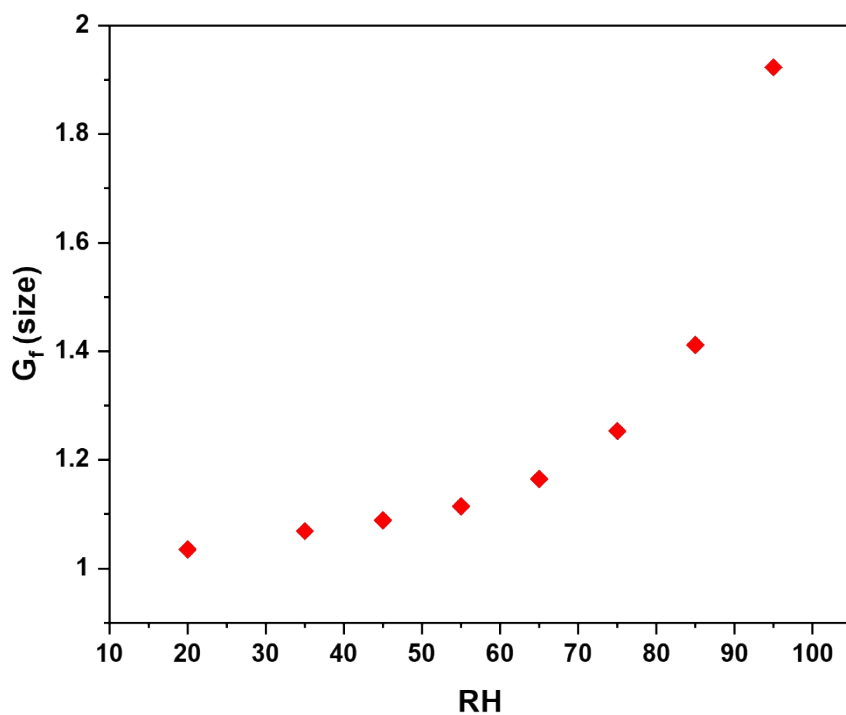

Figure S19: Hygroscopic Growth Factor (Size-Based) ( $G_r$ ) vs. Relative Humidity (RH, %): In the RH range of 30-60%, the size enhancement of aerosol particles is between 5-15%. This increase in size directly influences the condensation sink (CS) due to the linear relationship between CS and particle size in the continuum regime.

332

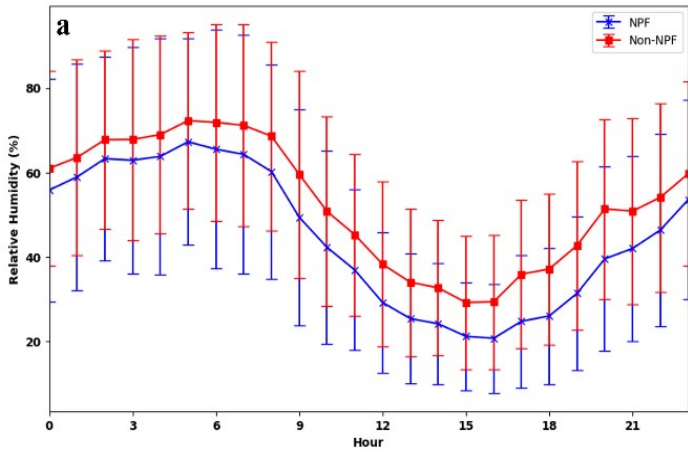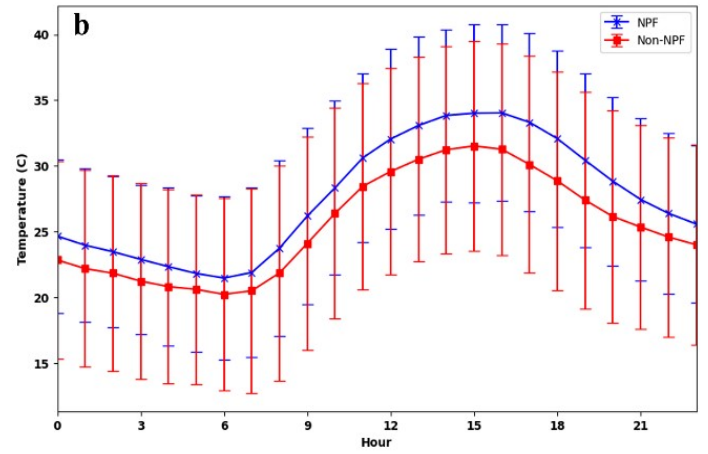

340

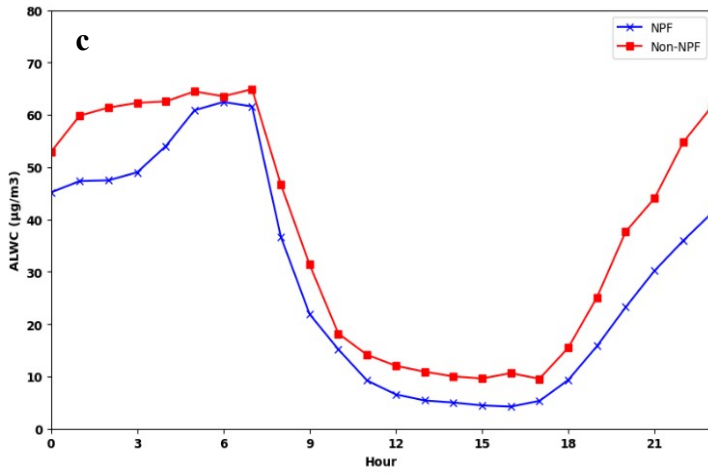

Figure S20: Average diurnal variation of RH, T and ALWC between NPF and non-NPF days during medium CS region ( $0.03$  to  $0.06 \text{ s}^{-1}$ ).

348

349

350

351

352

353

354

355

356

357

358

359

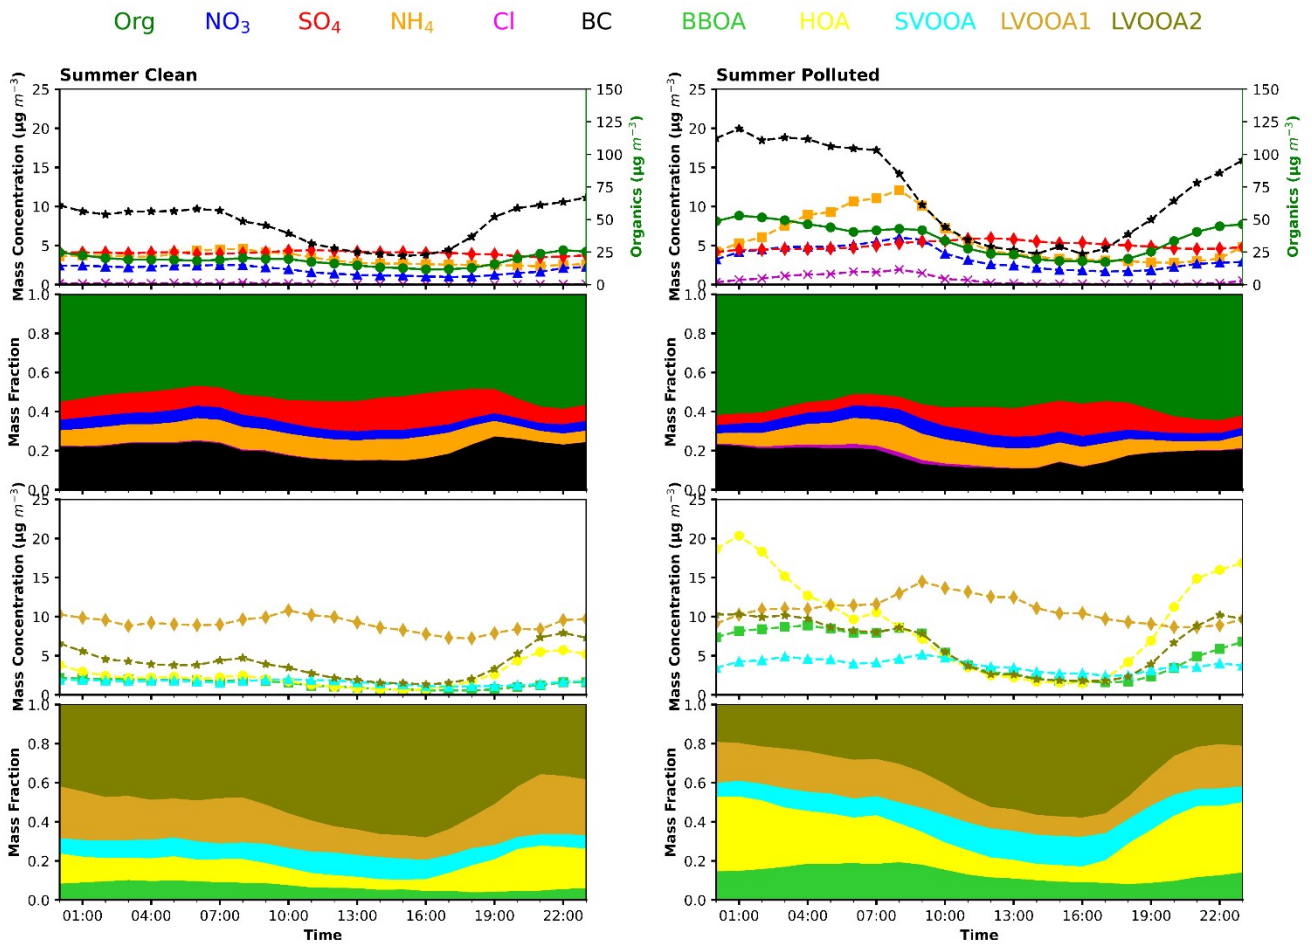

Figure S21: Diurnal variation of average composition of  $PM_{2.5}$  during clean and polluted days of summer season. Sulphate and oxygenated organic aerosols (LVOOA2) dominated the mass fractions of inorganics and organics, respectively, during the daytime when observed NPF events take place in our study both clean and polluted periods. The behaviour is similar to spring season, as shown in Figure 7.

360

361

362

363

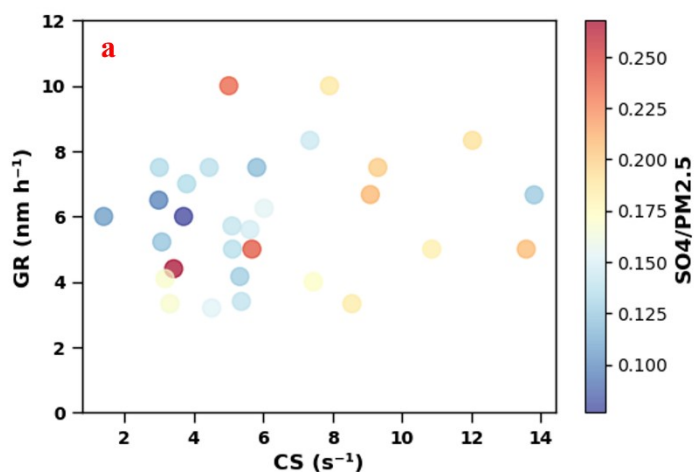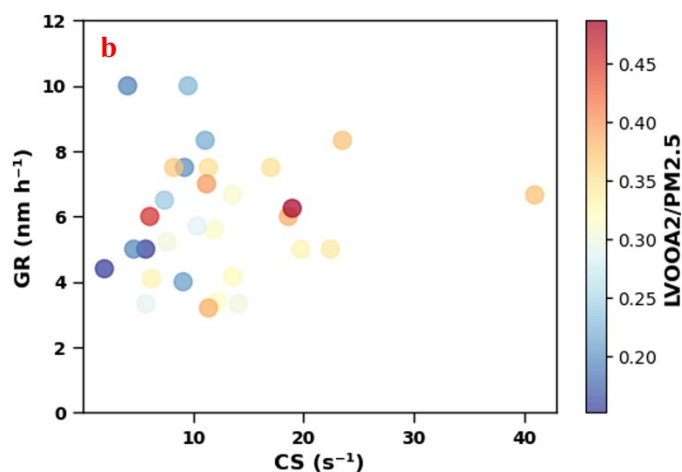

364

Figure S22: (a) the relationship between GR and CS, color-coded by (a)  $SO_4/PM_{2.5}$  and (b)  $LVOOA_2/PM_{2.5}$ . While  $SO_4$  and  $LVOOA_2$  fractions are at their highest during daytime NPF events and dominate  $PM_{2.5}$ , their ratios do not singularly dictate the growth rates of nucleation mode particles. The findings underscore the need for a more comprehensive approach, incorporating a broader range of variables and interactions to understand particle growth dynamics during NPF events fully.

365

366

367

368

369

370

371

372

373

374

375

376

377

378

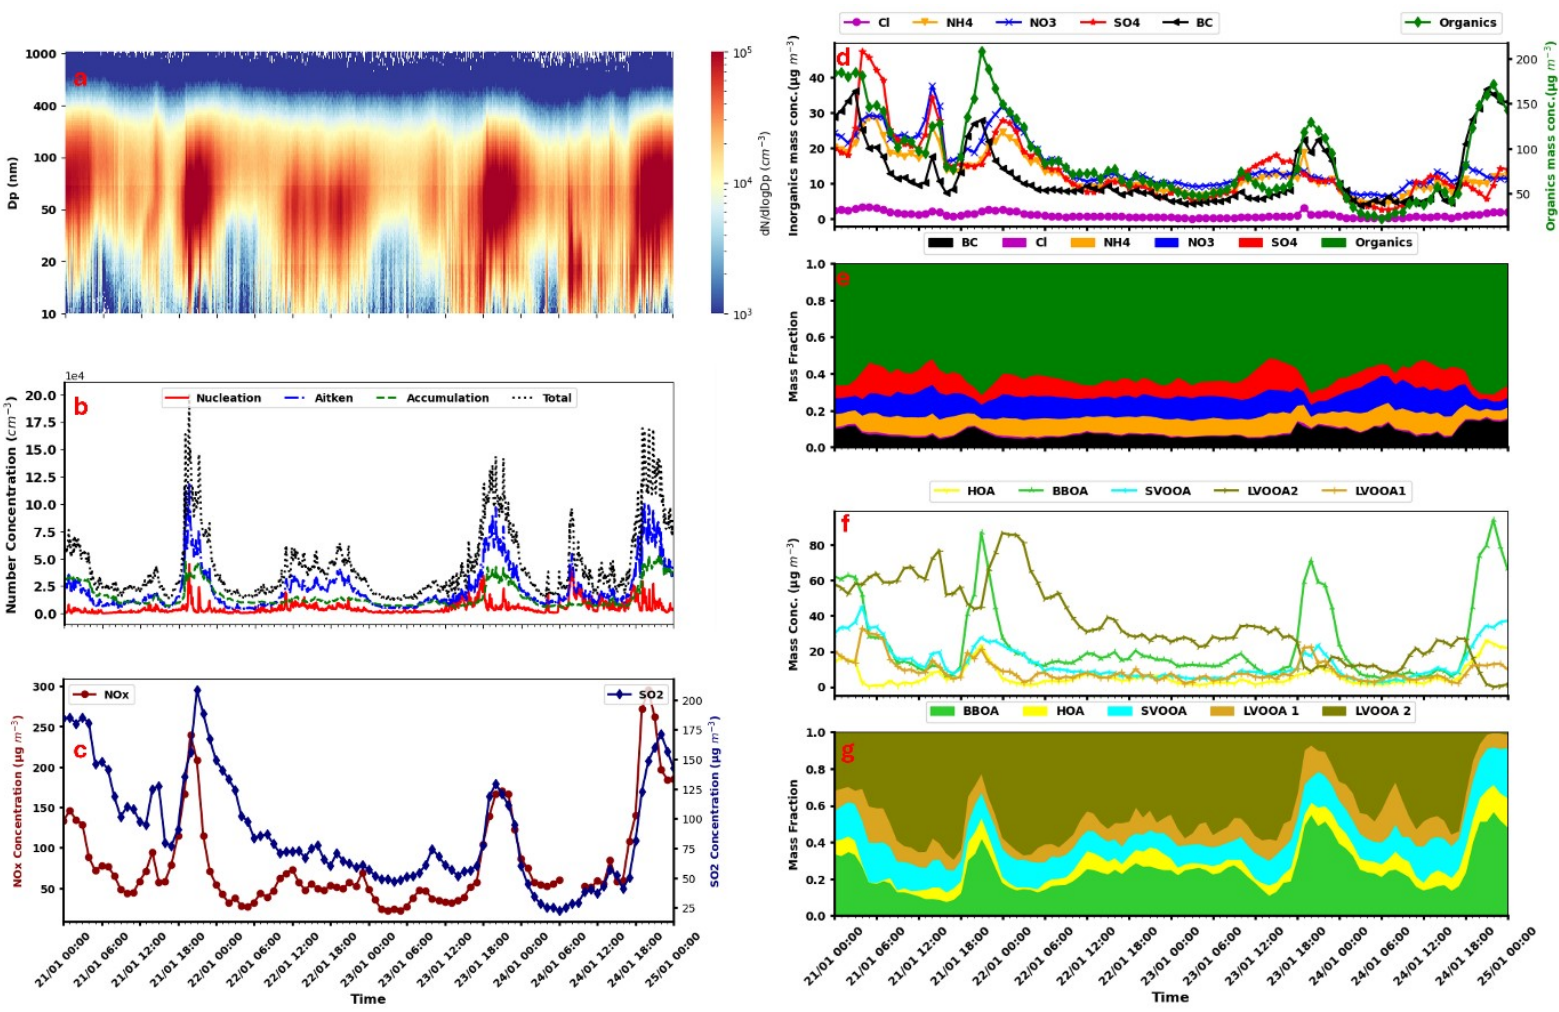

Figure S23: Temporal variation of particle size distribution, mode concentrations, trace gases ( $\text{NO}_x$  and  $\text{SO}_2$ ) along with chemical composition of  $\text{PM}_{2.5}$  on three consecutive polluted days of winter season. Higher CS inhibited the NPF during daytime. However, primary emitted particles undergo nighttime rapid growth due to coagulation between particles and condensation of vapours resulting from low RH and T. Primary nature of these processes is validated by the increase in mass concentration of

379  
 380  
 381  
 382  
 383  
 384  
 385  
 386  
 387  
 388

389

390

- 391 1. Chetna, ., Dhaka, S. K., Longiany, G., Panwar, V., Kumar, V., Malik, S., Rao, A. S.,  
392 Singh, N., Dimri, A. P., Matsumi, Y., Nakayama, T., & Hayashida, S. (2023). Trends  
393 and Variability of PM<sub>2.5</sub> at Different Time Scales over Delhi: Long-term Analysis  
394 2007–2021. *Aerosol and Air Quality Research*, 23(5), 220191.  
395 <https://doi.org/10.4209/aaqr.220191>
- 396 2. Li, J., Hao, X., Liao, H., Hu, J., & Chen, H. (2021). Meteorological Impact on Winter  
397 PM<sub>2.5</sub> Pollution in Delhi: Present and Future Projection Under a Warming Climate.  
398 *Geophysical Research Letters*, 48(13), e2021GL093722.  
399 <https://doi.org/https://doi.org/10.1029/2021GL093722>
- 400 3. Pant, P., Shukla, A., Kohl, S. D., Chow, J. C., Watson, J. G., & Harrison, R. M. (2015).  
401 Characterization of ambient PM<sub>2.5</sub> at a pollution hotspot in New Delhi, India and  
402 inference of sources. *Atmospheric Environment*, 109, 178–189.  
403 <https://doi.org/https://doi.org/10.1016/j.atmosenv.2015.02.074>
- 404 4. Gani, S., Bhandari, S., Seraj, S., Wang, D. S., Patel, K., Soni, P., Arub, Z., Habib, G.,  
405 Hildebrandt Ruiz, L., & Apte, J. S. (2019). Submicron aerosol composition in the  
406 world's most polluted megacity: The Delhi Aerosol Supersite study. *Atmospheric  
407 Chemistry and Physics*, 19(10), 6843–6859. <https://doi.org/10.5194/acp-19-6843-2019>
- 408 5. Dada, L., Paasonen, P., Nieminen, T., Buenrostro Mazon, S., Kontkanen, J., Peräkylä, O.,  
409 Lehtipalo, K., Hussein, T., Petäjä, T., Kerminen, V. M., Bäck, J., & Kulmala, M. (2017).  
410 Long-term analysis of clear-sky new particle formation events and nonevents in  
411 Hyytiälä. *Atmospheric Chemistry and Physics*, 17(10), 6227–6241.  
412 <https://doi.org/10.5194/acp-17-6227-2017>
- 413 6. Zhou, Y., Hakala, S., Yan, C., Gao, Y., Yao, X., Chu, B., Chan, T., Kangasluoma, J., Gani,  
414 S., Kontkanen, J., Paasonen, P., Liu, Y., Petäjä, T., Kulmala, M., & Dada, L. (2021).  
415 Measurement report: New particle formation characteristics at an urban and a mountain  
416 station in northern China. *Atmospheric Chemistry and Physics*, 21(23), 17885–17906.  
417 <https://doi.org/10.5194/acp-21-17885-2021>
- 418 7. Cai, J., Sulo, J., Gu, Y., Holm, S., Cai, R., Thomas, S., Neuberger, A., Mattsson, F.,  
419 Paglione, M., Decesari, S., Rinaldi, M., Yin, R., Aliaga, D., Huang, W., Li, Y.,  
420 Gramlich, Y., Ciarelli, G., Quéléver, L., Sarnela, N., ... Bianchi, F. (2024). Elucidating  
421 the mechanisms of atmospheric new particle formation in the highly polluted Po Valley,  
422 Italy. *Atmospheric Chemistry and Physics*, 24(4), 2423–2441.  
423 <https://doi.org/10.5194/acp-24-2423-2024>
- 424 8. Du, W., Cai, J., Zheng, F., Yan, C., Zhou, Y., Guo, Y., Chu, B., Yao, L., Heikkinen, L. M.,  
425 Fan, X., Wang, Y., Cai, R., Hakala, S., Chan, T., Kontkanen, J., Tuovinen, S., Petäjä, T.,  
426 Kangasluoma, J., Bianchi, F., ... Kulmala, M. (2022). Influence of Aerosol Chemical  
427 Composition on Condensation Sink Efficiency and New Particle Formation in Beijing.

- 428 *Environmental Science and Technology Letters*.  
429 <https://doi.org/10.1021/acs.estlett.2c00159>
- 430 9. Brean, J., Beddows, D. C. S., Harrison, R. M., Song, C., Tunved, P., Ström, J., Krejci, R.,  
431 Freud, E., Massling, A., Skov, H., Asmi, E., Lupi, A., & Dall'Osto, M. (2023).  
432 Collective geographical ecoregions and precursor sources driving Arctic new particle  
433 formation. *Atmospheric Chemistry and Physics*, 23(3), 2183–2198.  
434 <https://doi.org/10.5194/acp-23-2183-2023>
- 435 10. Lai, S., Qi, X., Huang, X., Lou, S., Chi, X., Chen, L., Liu, C., Liu, Y., Yan, C., Li, M.,  
436 Liu, T., Nie, W., Kerminen, V.-M., Petäjä, T., Kulmala, M., & Ding, A. (2024). New  
437 particle formation induced by anthropogenic–biogenic interactions on the southeastern  
438 Tibetan Plateau. *Atmospheric Chemistry and Physics*, 24(4), 2535–2553.  
439 <https://doi.org/10.5194/acp-24-2535-2024>
- 440 11. Mönkkönen, P., Koponen, I. K., Lehtinen, K. E. J., Hämeri, K., Uma, R., & Kulmala, M.  
441 (2005). Measurements in a highly polluted Asian mega city: observations of aerosol  
442 number size distribution, modal parameters and nucleation events. *Atmospheric  
443 Chemistry and Physics*, 5(1), 57–66. <https://doi.org/10.5194/acp-5-57-2005>
- 444 12. Xiao, S., Wang, M. Y., Yao, L., Kulmala, M., Zhou, B., Yang, X., Chen, J. M., Wang, D.  
445 F., Fu, Q. Y., Worsnop, D. R., & Wang, L. (2015). Strong atmospheric new particle  
446 formation in winter in urban Shanghai, China. *Atmospheric Chemistry and Physics*,  
447 15(4), 1769–1781. <https://doi.org/10.5194/acp-15-1769-2015>
- 448 13. Andreae, M. O., Andreae, T. W., Ditas, F., & Pöhlker, C. (2022). Frequent new particle  
449 formation at remote sites in the subboreal forest of North America. *Atmospheric  
450 Chemistry and Physics*, 22(4), 2487–2505. <https://doi.org/10.5194/acp-22-2487-2022>
- 451 14. Kanawade, V. P., Tripathi, S. N., Siingh, D., Gautam, A. S., Srivastava, A. K., Kamra, A.  
452 K., Soni, V. K., & Sethi, V. (2014). Observations of new particle formation at two  
453 distinct Indian subcontinental urban locations. *Atmospheric Environment*, 96, 370–379.  
454 <https://doi.org/https://doi.org/10.1016/j.atmosenv.2014.08.001>
- 455 15. Sebastian, M., Kanawade, V. P., & Pierce, J. R. (2021). Observation of sub-3nm particles  
456 and new particle formation at an urban location in India. *Atmospheric Environment*, 256,  
457 118460. <https://doi.org/https://doi.org/10.1016/j.atmosenv.2021.118460>
- 458 16. Hussein, T., Martikainen, J., Junninen, H., Sogacheva, L., Wagner, R., Dal Maso, M.,  
459 Riipinen, I., Aalto, P. P., & Kulmala, M. (2008). Observation of regional new particle  
460 formation in the urban atmosphere. *Tellus, Series B: Chemical and Physical  
461 Meteorology*, 60(4), 509–521. <https://doi.org/10.1111/j.1600-0889.2008.00365.x>
- 462 17. Dinoi, A., Weinhold, K., Wiedensohler, A., & Contini, D. (2021). Study of new particle  
463 formation events in southern Italy. *Atmospheric Environment*, 244, 117920.  
464 <https://doi.org/https://doi.org/10.1016/j.atmosenv.2020.117920>

- 465 18. Weiwei Hu Pedro Campuzano-Jost, D. A. D. P. C. M. R. C. J. T. J. D. R. W., & Jimenez,  
466 J. L. (2017). Evaluation of the new capture vaporizer for aerosol mass spectrometers  
467 (AMS) through field studies of inorganic species. *Aerosol Science and Technology*,  
468 51(6), 735–754. <https://doi.org/10.1080/02786826.2017.1296104>
- 469 19. Crenn, V., Sciare, J., Croteau, P. L., Verlhac, S., Fröhlich, R., Belis, C. A., Aas, W.,  
470 Äijälä, M., Alastuey, A., Artiñano, B., Baisnée, D., Bonnaire, N., Bressi, M.,  
471 Canagaratna, M., Canonaco, F., Carbone, C., Cavalli, F., Coz, E., Cubison, M. J., ...  
472 Favez, O. (2015). ACTRIS ACSM intercomparison – Part 1: Reproducibility of  
473 concentration and fragment results from 13 individual Quadrupole Aerosol Chemical  
474 Speciation Monitors (Q-ACSM) and consistency with co-located instruments.  
475 *Atmospheric Measurement Techniques*, 8(12), 5063–5087. [https://doi.org/10.5194/amt-](https://doi.org/10.5194/amt-8-5063-2015)  
476 8-5063-2015
- 477 20. Pich, J. (1972). Theory of gravitational deposition of particles from laminar flows in  
478 channels. *Journal of Aerosol Science*, 3(5), 351–361.  
479 [https://doi.org/https://doi.org/10.1016/0021-8502\(72\)90090-0](https://doi.org/https://doi.org/10.1016/0021-8502(72)90090-0)
- 480 21. Ingham, D. B. (1975). Diffusion of aerosols from a stream flowing through a cylindrical  
481 tube. *Journal of Aerosol Science*, 6(2), 125–132.  
482 [https://doi.org/https://doi.org/10.1016/0021-8502\(75\)90005-1](https://doi.org/https://doi.org/10.1016/0021-8502(75)90005-1)
- 483 22. Hu, M., Peng, J., Sun, K., Yue, D., Guo, S., Wiedensohler, A., & Wu, Z. (2012).  
484 Estimation of size-resolved ambient particle density based on the measurement of  
485 aerosol number, mass, and chemical size distributions in the winter in Beijing.  
486 *Environmental Science and Technology*, 46(18), 9941–9947.  
487 <https://doi.org/10.1021/es204073t>
- 488 23. Sarangi, B., Aggarwal, S. G., Sinha, D., & Gupta, P. K. (2016). Aerosol effective density  
489 measurement using scanning mobility particle sizer and quartz crystal microbalance with  
490 the estimation of involved uncertainty. *Atmospheric Measurement Techniques*, 9(3),  
491 859–875. <https://doi.org/10.5194/amt-9-859-2016>
- 492 24. Gani, S., Bhandari, S., Patel, K., Seraj, S., Soni, P., Arub, Z., Habib, G., Hildebrandt  
493 Ruiz, L., & Apte, J. S. (2020). Particle number concentrations and size distribution in a  
494 polluted megacity: the Delhi Aerosol Supersite study. *Atmospheric Chemistry and*  
495 *Physics*, 20(14), 8533–8549. <https://doi.org/10.5194/acp-20-8533-2020>
- 496 25. Laakso, L., Koponen, I. K., Mönkkönen, P., Kulmala, M., Kerminen, V. M., Wehner, B.,  
497 Wiedensohler, A., Wu, Z., & Hu, M. (2006). Aerosol particles in the developing world;  
498 A comparison between New Delhi in India and Beijing in China. *Water, Air, and Soil*  
499 *Pollution*, 173(1–4), 5–20. <https://doi.org/10.1007/s11270-005-9018-5>
- 500 26. Stokes, R. H., & Robinson, R. A. (1966). Interactions in Aqueous Nonelectrolyte  
501 Solutions. I. Solute-Solvent Equilibria. *The Journal of Physical Chemistry*, 70(7), 2126–  
502 2131. <https://doi.org/10.1021/j100879a010>



- 503 27. Ali, U., Faisal, M., Ganguly, D., Kumar, M., & Singh, V. (2023). Analysis of aerosol  
504 liquid water content and its role in visibility reduction in Delhi. *Science of the Total*  
505 *Environment*, 867. <https://doi.org/10.1016/j.scitotenv.2023.161484>
- 506 28. Alfarra, M. R., Prevot, A. S. H., Szidat, S., Sandradewi, J., Weimer, S., Lanz, V. A.,  
507 Schreiber, D., Mohr, M., & Baltensperger, U. (2007). Identification of the Mass Spectral  
508 Signature of Organic Aerosols from Wood Burning Emissions. *Environmental Science*  
509 *& Technology*, 41(16), 5770–5777. <https://doi.org/10.1021/es062289b>
- 510 29. Aiken, A. C., Salcedo, D., Cubison, M. J., Huffman, J. A., DeCarlo, P. F., Ulbrich, I. M.,  
511 Docherty, K. S., Sueper, D., Kimmel, J. R., Worsnop, D. R., Trimborn, A., Northway,  
512 M., Stone, E. A., Schauer, J. J., Volkamer, R. M., Fortner, E., de Foy, B., Wang, J.,  
513 Laskin, A., ... Jimenez, J. L. (2009). Mexico City aerosol analysis during MILAGRO  
514 using high resolution aerosol mass spectrometry at the urban supersite (T0) – Part 1:  
515 Fine particle composition and organic source apportionment. *Atmospheric Chemistry*  
516 *and Physics*, 9(17), 6633–6653. <https://doi.org/10.5194/acp-9-6633-2009>
- 517 30. N. L. Ng S. C. Herndon, A. T. M. R. C. P. L. C. T. B. O. D. S. D. R. W. Q. Z. Y. L. S., &  
518 Jayne, J. T. (2011). An Aerosol Chemical Speciation Monitor (ACSM) for Routine  
519 Monitoring of the Composition and Mass Concentrations of Ambient Aerosol. *Aerosol*  
520 *Science and Technology*, 45(7), 780–794.  
521 <https://doi.org/10.1080/02786826.2011.560211>
- 522 31. Zimmerman, A., Petters, M. D., & Meskhidze, N. (2020). Observations of new particle  
523 formation, modal growth rates, and direct emissions of sub-10 nm particles in an urban  
524 environment. *Atmospheric Environment*, 242, 117835.  
525 <https://doi.org/https://doi.org/10.1016/j.atmosenv.2020.117835>
- 526 32. Kulmala, N. (2016). *On the mode-segregated aerosol particle number concentration*  
527 *load : contributions of primary and secondary particles in.*  
528 <http://hdl.handle.net/10138/165340>
- 529 33. Pey, J., Querol, X., Alastuey, A., Rodríguez, S., Putaud, J. P., & Van Dingenen, R.  
530 (2009). Source apportionment of urban fine and ultra-fine particle number concentration  
531 in a Western Mediterranean city. *Atmospheric Environment*, 43(29), 4407–4415.  
532 <https://doi.org/https://doi.org/10.1016/j.atmosenv.2009.05.024>
- 533 34. Kulmala, M., Petäjä, T., Nieminen, T., Sipilä, M., Manninen, H. E., Lehtipalo, K., Dal  
534 Maso, M., Aalto, P. P., Junninen, H., Paasonen, P., Riipinen, I., Lehtinen, K. E. J.,  
535 Laaksonen, A., & Kerminen, V. M. (2012). Measurement of the nucleation of  
536 atmospheric aerosol particles. *Nature Protocols*, 7(9), 1651–1667.  
537 <https://doi.org/10.1038/nprot.2012.091>
- 538 35. KULMALA, M., MASO, M. D., MAKELA, J. M., PIRJOLA, L., VAKEVA, M.,  
539 AALTO, P., MIIKKULAINEN, P., HAMERI, K., & O'DOWD, C. D. (2001). On the  
540 formation, growth and composition of nucleation mode particles. *Tellus B*, 53(4), 479–  
541 490. <https://doi.org/10.1034/j.1600-0889.2001.530411.x>

- 542 36. *ATMOSPHERIC CHEMISTRY AND PHYSICS*. (n.d.).
- 543 37. Dada, L., Ylivinkka, I., Baalbaki, R., Li, C., Guo, Y., Yan, C., Yao, L., Sarnela, N.,  
544 Jokinen, T., Daellenbach, K. R., Yin, R., Deng, C., Chu, B., Nieminen, T., Wang, Y.,  
545 Lin, Z., Thakur, R. C., Kontkanen, J., Stolzenburg, D., ... Kulmala, M. (2020). Sources  
546 and sinks driving sulfuric acid concentrations in contrasting environments: implications  
547 on proxy calculations. *Atmospheric Chemistry and Physics*, 20(20), 11747–11766.  
548 <https://doi.org/10.5194/acp-20-11747-2020>
- 549 38. Mikkonen, S., Romakkaniemi, S., Smith, J. N., Korhonen, H., Petäjä, T., Plass-Duelmer,  
550 C., Boy, M., McMurry, P. H., Lehtinen, K. E. J., Joutsensaari, J., Hamed, A., Mauldin  
551 III, R. L., Birmili, W., Spindler, G., Arnold, F., Kulmala, M., & Laaksonen, A. (2011).  
552 A statistical proxy for sulphuric acid concentration. *Atmospheric Chemistry and Physics*,  
553 11(21), 11319–11334. <https://doi.org/10.5194/acp-11-11319-2011>
- 554 39. Petäjä, T., Mauldin III, R. L., Kosciuch, E., McGrath, J., Nieminen, T., Paasonen, P.,  
555 Boy, M., Adamov, A., Kotiaho, T., & Kulmala, M. (2009). Sulfuric acid and OH  
556 concentrations in a boreal forest site. *Atmospheric Chemistry and Physics*, 9(19), 7435–  
557 7448. <https://doi.org/10.5194/acp-9-7435-2009>
- 558
- 559
- 560
